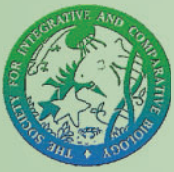

## SYMPOSIUM

# Australian Barnacles (Cirripedia: Thoracica), Distributions and Biogeographical Affinities

Diana S. Jones<sup>1</sup>

Western Australian Museum, 49 Kew Street, Welshpool, Western Australia 6106, Australia

From the symposium “Barnacle Biology: Essential Aspects and Contemporary Approaches” presented at the annual meeting of the Society for Integrative and Comparative Biology, January 3–7, 2012 at Charleston, South Carolina.

<sup>1</sup>E-mail: [diana.jones@museum.wa.gov.au](mailto:diana.jones@museum.wa.gov.au)

**Synopsis** Currently, 279 barnacle species are recognized in Australia waters. The barnacle fauna of tropical Australia exhibits high species diversity (221), with a high incidence of tropical species (87 Indo-west Pacific [IWP], 16 West Pacific and 65 Indo-Malayan), a low species endemism (8), and 44 cosmopolitan and 1 Australasian species. Conversely, that of temperate Australia shows lower species diversity (129), with a lower incidence of tropical species (26 IWP, 10 West Pacific and 25 Indo-Malayan), higher species endemism (23), 37 cosmopolitan, 6 Australasian species, and 3 Australasian/Antarctic species. Distributions corroborate the general patterns demonstrated by the shallow-water biota of northern tropical and southern temperate Australian biogeographic provinces. Tropical and temperate provinces grade into each other in a broad overlap zone along both the western and eastern Australian coasts. This overlap zone is essentially a transitional region, with the gradual replacement of a tropical barnacle fauna in the north by a predominantly temperate barnacle fauna in the south. Both western and eastern Australian coasts are bounded by major poleward-flowing warm currents that have considerable influence on the marine flora and fauna, distributing tropical species of many taxa much farther south than could be predicted by latitude. Currently, 16 barnacle species introduced into Australian waters are identified, although this number may increase in the future due to new port developments and increased shipping arrivals.

## Introduction

The island continent of Australia, lying between 9–44°S and 112–154°E, has a vast coastline of ~34,218 km. Bounded by the Indian, Pacific and Southern oceans on its western, eastern, and southern margins, and the Arafura and Timor seas on its northern margin, its complex biogeographical positioning has resulted in diverse terrestrial and marine faunas.

First collections of barnacles in Australia were made during early French expeditions of discovery (Bonnemains and Jones 1990) but Darwin's monographs (1852, 1854) initiated the documentation of the barnacles of temperate Australia. During the late 19th and early 20th centuries, various expeditions added to the knowledge of this fauna (e.g., Hoek 1883, 1907, 1913; Krüger 1914; Broch 1916, 1922, 1931). Pioneering studies by Pope (e.g., 1943, 1945,

1958, 1965) increased knowledge of cirripede distributions in eastern Australia, and since the mid 1980s, comprehensive field collecting throughout Australian waters by Jones greatly augmented documentation of the barnacle fauna (e.g., Jones 1987, 1990a, 1990b, 1991, 1992a, 1992b, 1992c, 1993, 1994, 1998, 2003, 2004, 2010; Jones et al. 1990; Jones and Hewitt 1995, 1996, 1997; Jones and Berry 2000).

Two hundred and seventy-nine barnacle species are known in Australian waters. This article discusses the distributions and biogeographic affinities of the barnacles of the tropical and temperate waters of Australia. Abbreviations are as follows: WA (Western Australia), SA (South Australia), Tas. (Tasmania), Vic. (Victoria), NSW (New South Wales), Qld (Queensland), and NT (Northern Territory).

## Marine biogeographical zonation of Australia

### Currents

Four oceanic and coastal currents in the Australasian region are significant in shaping the climate and marine environmental conditions of Australia, namely, the Indonesian Throughflow, the Leeuwin Current, the East Australian Current (EAC), and the Antarctic Circumpolar Current (Fig. 1).

The Indonesian Throughflow is a series of currents that carry water westward from the Pacific Ocean to the Indian Ocean through the straits and deep passages of the Indonesian Archipelago. This warm tropical water influences the character of the Leeuwin Current, a poleward flowing, eastern boundary current off the western and southern coasts of Australia, which is the world's longest coastal current (>5000 km) (Cresswell and Golding 1980). It originates near the North West Shelf on Australia's northwestern coast and is a broad body, ~50 km wide and 200 m deep, of warm, relatively low salinity water flowing along the outer edge of the continental shelf (Godfrey and Ridgeway 1985). The Leeuwin Current is mostly quiescent in the austral summer (November–February) but flows to the south intensify in autumn (March), are strongest in late autumn/early winter (April–June), and disappear in September–October (Feng et al. 2003). In the autumn/early winter, the Leeuwin Current accelerates, rounds Cape Leeuwin (34°27'S 116°22'E) in southwestern WA, and continues as an eastward

shelf current, the South Australian Current, along the southern coast of Australia (Ridgeway and Condie 2004; Middleton and Bye 2007). As the Leeuwin Current travels poleward, it breaks into a series of southward and eastward flowing eddies (Feng et al. 2005), eventually dissipating in the Tasman Sea and Southern Ocean.

The Leeuwin Current disperses tropical representatives of many taxa (e.g., asteroids, holothurians, tuna, and tropical reef fishes) to the southwestern and southern coasts of Australia, farther south than could be predicted by latitude (Maxwell and Cresswell 1981; Hutchins and Pearce 1994). It is very different from the other Southern-Hemisphere eastern-boundary currents, the Humboldt Current of South America, and the Benguela Current of South Africa, which are northward flowing, cool, and associated with upwelling. The Leeuwin Current roughly parallels the EAC, which brings warm waters southward to ~33°S (Newcastle, NSW) before diverting as eddies into the Tasman Sea.

The EAC is a complex western boundary system in the southwestern Pacific off eastern Australia (Ridgeway and Dunn 2003; Ridgeway and Hill 2009). It flows southward from ~25°S (near Fraser Island, Qld) and begins to dissipate beyond 33°S, with remnants continuing to drift south. It provides both the western boundary of the South Pacific Gyre and the linking element between the Pacific and Indian Ocean gyres (Speich et al. 2002). The EAC is strongest in the austral summer (November–February). It is weaker than other western boundary

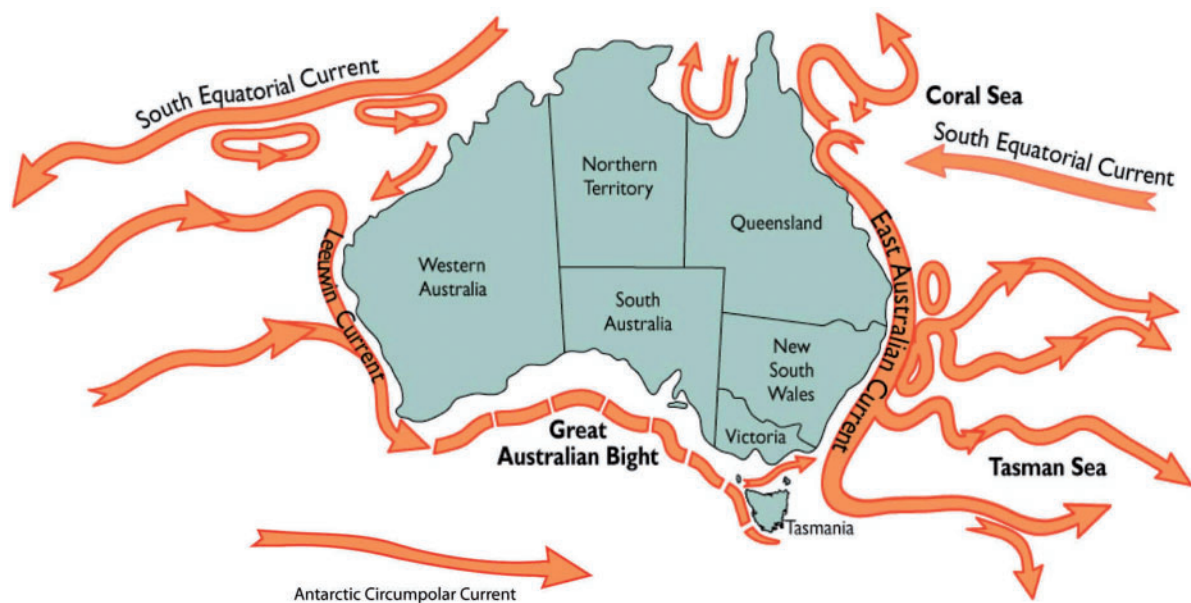

Image: CSIRO

Fig. 1 Oceanic and coastal currents of Australia

currents and a series of mesoscale eddies dominate, producing highly variable patterns of strength and direction of currents (Bowen et al. 2005; Mata et al. 2007). Long-term data indicate that the EAC has strengthened and extended further southward over the past 60 years, so that tropical waters from the Coral Sea region are forced further south, warming the Tasman Sea (Ridgeway 2007). Evidence from biological sources indicates southward range extensions of biota (Edgar et al. 1997; Pittock 2003; Thresher et al. 2003; Ling et al. 2008), which have been attributed to enhanced flow (Edyvane 2003). Thus, Australia is unique among continents in that both the western and eastern coasts are bounded by major poleward-flowing warm currents that have considerable influence on marine flora and fauna (Richardson and Poloczanska 2009).

The Antarctic Circumpolar Current is the dominant feature of the Southern Ocean. It connects the Atlantic, Pacific, and Indian Oceans in an eastward flow, allowing water, heat, salt, and other properties to flow from one to the other and is considered the powerhouse of the global climate ([www.csiro.au/Outcomes/Climate/Australasian Ocean Currents](http://www.csiro.au/Outcomes/Climate/Australasian%20Ocean%20Currents)). It is confined by land between Tasmania and Antarctic and this region features high oceanic nutrient production.

### Australian biogeographic provinces

In Australia, the Tropic of Capricorn lies at  $23^{\circ}26'22''\text{S}$ , with latitudes to the south in the southern zone and those to the north in the tropics

(Fig. 2). A northern tropical and a southern temperate biogeographic province are recognized, which overlap extensively on both western and eastern coasts (Wilson and Allen 1987; O'Hara and Poore 2000; Poore 2001, 2004; Poore and O'Hara 2007; Poore et al. 2008; Waters 2010).

The northern tropical province has a tropical marine biota that is continuous with other parts of the IWP. It exhibits high species diversity, a high incidence of tropical species and low endemism at the species level (Wells 1980; Wilson and Allen 1987). Conversely, the southern temperate province has lower species diversity and harbors much higher numbers of endemic species, due to their long history of geographic isolation from other temperate regions over geological time. For example, approximately 95% of molluscan species, 90% of echinoderm species, and 85% of fish species are unique to these southern waters Australia (Poore 2001). This high endemism is also apparent in Australia's temperate macroalgae (Phillips 2001).

In general, species diversity decreases with increasing latitude but there are no major distributional boundaries. On the western coast, most IWP tropical species extend to North West Cape, WA ( $21^{\circ}47'\text{S}$ ), and some as far south as the Houtman Abrolhos Islands ( $28^{\circ}19'-29^{\circ}57'\text{S}$ ), and on the eastern coast approximately to Point Vernon, Qld ( $25^{\circ}14' 53 \text{ S}$ ,  $152^{\circ} 49'\text{E}$ ) (Jones 2003, 2010). However, the importance of the major currents in structuring marine communities can be seen in the biogeographic distributions of many species, functional groups, and

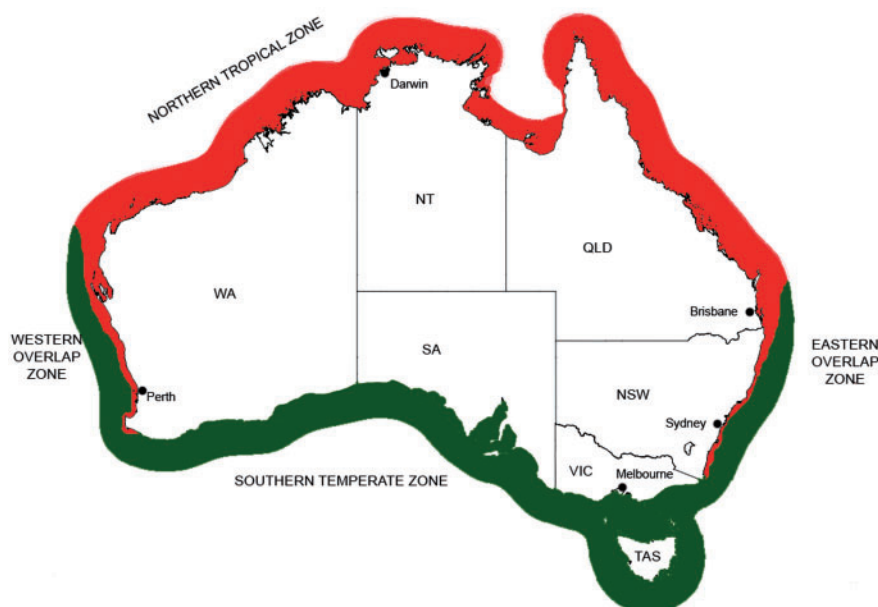

Fig. 2 Northern tropical and southern temperate biogeographic provinces of Australia

communities. For example, tropical species can occur much farther south at latitudes inhabited by wholly temperate species due to the effects of the Leeuwin and the East Australian currents (Maxwell and Cresswell 1981; Morgan and Wells 1991; Dunlop and Wooller 1986; O'Hara and Poore 2000; Edyvane 2003; Griffiths 2003).

### Distributions and biogeographic affinities of barnacles in Australian waters

Currently, 279 barnacle species are known in Australian waters (Table 1). Fifty-four are cosmopolitan (C) species, 92 have IWP affinities and 21 West Pacific (WP), and 76 Indo-Malayan (IM) affinities. Six species are Australasian (AA), occurring in Australia and New Zealand waters, and two are Southern Ocean species (SAA), occurring in Australia, New Zealand, and Antarctica. Twenty-eight species are endemic (AE) to Australian waters (Tables 2 and 3).

#### Northern Australian tropical province

The tropical barnacle fauna is continuous with other parts of the IWP region and exhibits the high species diversity, high incidence of tropical species, and low species endemicity pattern. It consists of 221 species, 44 of which are C species. Eighty-seven have IWP affinities and 16 have WP and 65 IM affinities. One species has AA affinities and eight are AE species (Tables 2 and 3).

A dominant IWP faunistic element in the northern Australian tropical province also has been documented in other groups, e.g., Thalassinidea, Anomura, and Brachyura (78%) (Morgan 1990); Penaeidae (Dall 1957; Racek 1959); Portunidae (Stephenson 1972); Stomatopoda (Stephenson and McNeil 1955); Echinodermata (77%) (Marsh and Marshall 1983); Mollusca (71%) (Wells 1980); fishes (Blaber et al. 1985); and marine algae (Womersley 1960). Similarly, a low AE element has been documented in brachyuran and anomuran decapods (17–22%) (Griffin and Yaldwyn 1967; Morgan 1990; Morgan and Wells 1991); echinoderms (13%) (Marsh 1976; Marsh and Marshall 1983); molluscs (10%) (Wilson and Allen 1987); corals (0%) (Wilson and Allen 1987; Veron and Marsh 1988), and fishes (13%) (Wilson and Allen 1987).

Currently, there are no specific field data regarding the barnacle faunas of the remote tropical northern and northeastern coasts of Australia, where collecting is logistically extremely difficult. Field data from north-western Australia indicate 101 species in 40 genera within 15 families, including 26 C,

**Table 1** Barnacles (Cirripedia: Thoracica) of Australian waters

---

|                                                                                         |
|-----------------------------------------------------------------------------------------|
| Subclass CIRRIPEDIA Burmeister, 1834                                                    |
| Superorder THORACICA Darwin, 1854                                                       |
| Order Ibliformes Buckeridge and Newman, 2006                                            |
| Suborder Iblomorpha Newman, 1987                                                        |
| Family Iblidae Leach, 1825                                                              |
| Genus <i>Ibla</i> Leach, 1825                                                           |
| <i>Ibla cumingi</i> Darwin, 1852                                                        |
| <i>Ibla quadrivalvis</i> Cuvier, 1817                                                   |
| Family Idioiblididae Buckeridge and Newman, 2006                                        |
| Subfamily Idioiblinae Buckeridge and Newman, 2006                                       |
| Genus <i>Idioibla</i> Buckeridge and Newman, 2006                                       |
| <i>Idioibla pygmaea</i> Broch, 1922                                                     |
| Subfamily Chaetolepadinae Buckeridge and Newman, 2006                                   |
| Genus <i>Chaetolepas</i> Stüder, 1889                                                   |
| <i>Chaetolepas calcitergum</i> Buckeridge and Newman, 2006                              |
| Order Lepadiformes Buckeridge and Newman, 2006                                          |
| Suborder Heteralepdomorpha Newman, 1987                                                 |
| Family Heteralepadidae Nilsson-Cantell, 1921                                            |
| Genus <i>Heteralepas</i> Pilsbry, 1907                                                  |
| <i>Heteralepas adiposa</i> Zevina, 1982                                                 |
| <i>Heteralepas cornuta</i> (Darwin, 1852)                                               |
| <i>Heteralepas dubia</i> Broch, 1922                                                    |
| <i>Heteralepas japonica</i> (Aurivillius, 1892)                                         |
| <i>Heteralepas utinomii</i> Newman, 1960                                                |
| Genus <i>Paralepas</i> Pilsbry, 1907                                                    |
| <i>Paralepas dannevigii</i> (Broch, 1922)                                               |
| <i>Paralepas georgei</i> Daniel, 1970                                                   |
| <i>Paralepas intermedia</i> (Hoek, 1907)                                                |
| <i>Paralepas minuta</i> (Phillipi, 1836)                                                |
| <i>Paralepas morula</i> (Hoek, 1907)                                                    |
| <i>Paralepas palinuri urea</i> Newman, 1960                                             |
| <i>Paralepas pedunculata</i> (Hoek, 1883)                                               |
| <i>Paralepas quadrata</i> (Aurivillius, 1894)                                           |
| <i>Paralepas scyllarusi</i> Utinomi, 1967a                                              |
| <i>Paralepas tuberosa</i> (Nilsson-Cantell, 1932)                                       |
| Family Malacolepadidae Hiro, 1933                                                       |
| Genus <i>Arcalepas</i> Jones and Morton, 2009                                           |
| <i>Arcalepas brucei</i> Jones and Morton, 2009                                          |
| Suborder Lepadomorpha Pilsbry, 1916                                                     |
| Family Oxynaspididae Gruvel, 1905                                                       |
| Genus <i>Oxynaspis</i> Darwin, 1852                                                     |
| <i>Oxynaspis celata</i> Darwin, 1852 [includes <i>Oxynaspis indica</i> Annandale, 1910] |
| Family Poecilasmatidae Annandale, 1910                                                  |
| Genus <i>Poecilasma</i> Darwin, 1852                                                    |
| <i>Poecilasma dubium</i> Hoek, 1907                                                     |

---

(continued)

Table 1 Continued

---

*Poecilasma kaempferi* Darwin, 1852  
 Genus *Glyptelasma* Pilsbry, 1907  
*Glyptelasma carinatum* (Hoek, 1883)  
*Glyptelasma gigas* (Annandale, 1916)  
*Glyptelasma gracile* (Hoek, 1883)  
*Glyptelasma hamatum* Calman, 1919  
*Glyptelasma orientale* Calman, 1919  
*Glyptelasma pilsbryi* Calman, 1919  
*Glyptelasma rectum* (Pilsbry, 1907)  
 Genus *Megalasma* Hoek, 1883  
*Megalasma minus* (Annandale, 1906)  
*Megalasma striatum* Hoek, 1883  
 Genus *Temnaspis* Fischer, 1884  
*Temnaspis amygdalum* (Aurivillius, 1894)  
*Temnaspis bathynomi* (Annandale, 1906)  
*Temnaspis excavatum* (Hoek, 1907)  
*Temnaspis fissum* (Darwin, 1852)  
*Temnaspis kilepoeae* Zevina, 1968  
*Temnaspis tridens* (Aurivillius, 1894)  
*Temnaspis tridens asymmetrica* Broch, 1947  
 Genus *Octolasmis* Gray, 1825  
*Octolasmis angulata* (Aurivillius, 1894: 22) [includes *O. aperta* Aurivillius, 1894: 24]  
*Octolasmis aymonini* (Lesson and Tapparone-Canefri, 1874)  
*Octolasmis cf bullata* (Aurivillius, 1892)  
*Octolasmis clubii* Daniel, 1953  
*Octolasmis cor* (Aurivillius, 1892)  
*Octolasmis geryonophila geryonophila* Pilsbry, 1907  
*Octolasmis hawaiiense* Pilsbry, 1907  
*Octolasmis hoeki* (Stebbing, 1894)  
*Octolasmis indubia* Newman, 1961  
*Octolasmis lowei* (Darwin, 1852)  
*Octolasmis neptuni neptuni* (MacDonald, 1869)  
*Octolasmis nierstraszi* (Hoek, 1907)  
*Octolasmis scuticosta* Hiro, 1939  
*Octolasmis warwickii* Gray, 1825 (includes *Dichelaspis equina* Lanchester, 1902)  
*Octolasmis weberi* (Hoek, 1907)  
 Genus *Dichelaspis* Darwin, 1852  
*Dichelaspis orthogonia* Darwin, 1852  
 Genus *Trilasmis* Hinds, 1844  
*Trilasmis eburnea* Hinds, 1844  
 Family Lepadidae Darwin, 1852  
 Genus *Lepas* Linnaeus, 1758  
 Subgenus *Nonfurcata* Memmi, 1980  
*Lepas Nonfurcata nonfurcata* (Nilsson-Cantell, 1927)

---

(continued)

Table 1 Continued

---

Subgenus *Anatifa* Bruguière, 1789  
*Lepas Anatifa anatifera anatifera* Linnaeus, 1758  
*Lepas Anatifa anatifera dentata* Linnaeus, 1758  
*Lepas Anatifa anatifera striata* de Graef, 1952  
*Lepas Anatifa anserifera* Linnaeus, 1767  
*Lepas Anatifa australis* Darwin, 1852  
*Lepas Anatifa hillii* (Leach, 1818)  
*Lepas Anatifa indica* Annandale, 1910  
*Lepas Anatifa pectinata* Spengler, 1793  
*Lepas Anatifa testudinata* Aurivillius, 1892  
 Genus *Dosima* Gray, 1825  
*Dosima fascicularis* Ellis and Solander, 1786  
 Genus *Conchoderma* Olfers, 1814  
*Conchoderma auritum* (Linnaeus, 1767)  
*Conchoderma chelonophilum* (Leach, 1818)  
*Conchoderma hunteri* (Owen, 1830)  
*Conchoderma virgatum* (Spengler, 1790)  
 Genus *Alepas* Sander-Rang, 1829  
*Alepas pacifica* Pilsbry, 1907  
 Order Scalpelliformes Buckeridge and Newman, 2006  
 Suborder Scalpellomorpha Newman, 1987  
 Family Calanticidae Zevina, 1978  
 Genus *Calantica* Gray, 1825  
*Calantica affinis* Broch, 1922  
*Calantica darwini* Jones and Hosie, 2009  
*Calantica studeri* (Weltner, 1922)  
*Calantica trispinosa* (Hoek, 1883)  
 Genus *Crosnieriella* Jones, 1998  
*Crosnieriella acanthosubarinae* Jones, 1998  
 Genus *Scillaelepas* Seguenza, 1876  
*Scillaelepas cf fosteri* Newman, 1980 (see Buckeridge, 1999: 528)  
 Genus *Smilium* Gray, 1825  
*Smilium nudipes* (Annandale, 1916)  
*Smilium peronii* Gray, 1825  
*Smilium sinense* (Annandale, 1910)  
*Smilium zancleanum* (Withers, 1953)  
 Family Lithotryidae Gruvel, 1905  
 Genus *Lithotrya* Sowerby, 1822  
*Lithotrya dorsalis* (Ellis, 1786)  
*Lithotrya nicobarica* Reinhardt, 1850  
*Lithotrya valentiana* (Gray, 1825)  
 Family Scalpellidae Pilsbry, 1907  
 Subfamily Scalpellinae Pilsbry, 1907  
 Genus *Scalpellum* Leach, 1817  
*Scalpellum inerme* Annandale, 1905

---

(continued)

Table 1 Continued

*Scalpellum stearnsii* Pilsbry, 1890  
 Subfamily Meroscalpellinae Zevina, 1978  
 Genus *Litoscalpellum* Newman and Ross, 1971  
*Litoscalpellum giganteum* (Gruvel, 1902)  
*Litoscalpellum intermedium* (Hoek, 1883)  
*Litoscalpellum juddi* (Calman, 1918)  
*Litoscalpellum nipponense* (Pilsbry, 1907)  
 Genus *Alcockianum* Zevina, 1978  
*Alcockianum alcockianum* (Annandale, 1906)  
*Alcockianum persona* (Annandale, 1916)  
 Genus *Gymnoscalpellum* Newman and Ross, 1971  
*Gymnoscalpellum tarasovi* Newman and Ross, 1971  
 Genus *Annandaleum* Newman and Ross, 1971  
*Annandaleum laccadivicum* (Annandale, 1906)  
*Annandaleum lambda* (Annandale, 1910)  
 Subfamily Arcoscalpellinae Zevina, 1978  
 Genus *Arcoscalpellum* Hoek, 1907  
*Arcoscalpellum dubium* (Hoek, 1883)  
*Arcoscalpellum gryllum* Zevina, 1981  
*Arcoscalpellum inum* Zevina, 1981  
*Arcoscalpellum mendelevii* Zevina, 1981  
*Arcoscalpellum pertosum* Foster, 1978  
*Arcoscalpellum sociabile* (Annandale, 1905)  
*Arcoscalpellum truncatum* (Hoek, 1883)  
 Genus *Planoscalpellum* Zevina, 1978  
*Planoscalpellum planum* (Hoek, 1883)  
 Genus *Weltnerium* Zevina, 1978  
*Weltnerium poculum* (Hoek, 1907)  
 Genus *Verum* Zevina, 1978  
*Verum australicum* (Hoek, 1883)  
*Verum candidum* (Hoek, 1907)  
*Verum novaezelandiae* (Hoek, 1883)  
*Verum proclive* (Hoek, 1907)  
*Verum virgatum* (Hoek, 1907)  
 Genus *Anguloscalpellum* Zevina, 1978  
*Anguloscalpellum pedunculatum* (Hoek, 1883)  
 Genus *Amigdoscalpellum* Zevina, 1978  
*Amigdoscalpellum costellatum* (Withers, 1935)  
*Amigdoscalpellum daschae* Zevina, 1981  
*Amigdoscalpellum elegans* (Hoek, 1907)  
*Amigdoscalpellum torbenbenwolffi* Zevina, 1981  
*Amigdoscalpellum vitreum* (Hoek, 1883)  
 Genus *Trianguloscalpellum* Zevina, 1978  
*Trianguloscalpellum annandalei* (Calman, 1918)  
*Trianguloscalpellum hamulus* (Hoek, 1907)

(continued)

Table 1 Continued

*Trianguloscalpellum hirsutum* (Hoek, 1883)  
*Trianguloscalpellum michelottianum* (Seguenza, 1876)  
*Trianguloscalpellum moluccanum* (Hoek, 1883)  
*Trianguloscalpellum regium regium* (Hoek, 1883)  
*Trianguloscalpellum rubrum* (Hoek, 1883)  
 Genus *Teloscalpellum* Zevina, 1978  
*Teloscalpellum ecaudatum* (Calman, 1918)  
*Teloscalpellum gracile* (Hoek, 1907)  
*Teloscalpellum latisculum* (Newman and Ross, 1971)  
 Order Sessilia Lamarck, 1818  
 Suborder Verrucomorpha Pilsbry, 1916  
 Family Verrucidae Darwin, 1854  
 Genus *Altiverruca* Pilsbry, 1916  
*Altiverruca gibbosa* (Hoek, 1883)  
*Altiverruca navicula* (Hoek, 1913)  
*Costatoverruca* Young, 1998  
*Costatoverruca pacifica* (Buckeridge, 1994)  
*Cristallinaverruca* Young, 1998  
*Cristallinaverruca cristallina* (Gruvel, 1907)  
 Genus *Metaverruca* Pilsbry, 1916  
*Metaverruca halothea* (Pilsbry, 1907) [includes *M. recta* (Aurivillius, 1898)]  
*Metaverruca sculpta* (Aurivillius, 1898)  
*Newmaniverruca* Young, 1998  
*Newmaniverruca albatrossiana* (Pilsbry, 1912)  
 Genus *Rostratoverruca* Broch, 1922  
*Rostratoverruca intexta* (Pilsbry, 1912) [includes *Altiverruca conchula* (Hoek, 1913)]  
 Suborder Balanomorpha Pilsbry, 1916  
 Superfamily Pachylasmatoidea Utinomi, 1968  
 Family Pachylasmatidae Utinomi, 1968  
 Subfamily Bathylasmatinae Newman and Ross, 1976  
 Genus *Bathylasma* Newman and Ross, 1971  
*Bathylasma alearum* (Foster, 1978)  
 Genus *Tetrachaelasma* Newman and Ross, 1971  
*Tetrachaelasma tasmanicum* Buckeridge, 1999  
 Subfamily Hexelasmatinae Newman and Ross, 1976  
*Hexelasma* Hoek, 1913  
*Hexelasma arafurae* Hoek, 1913  
*Hexelasma nolearia* Foster, 1978  
 Subfamily Pachylasmatinae Utinomi, 1968  
 Genus *Eutomolasma* Jones, 2000  
*Eutomolasma chinense* (Pilsbry, 1912)  
*Eutomolasma japonicum* (Hiro, 1933)  
*Eutomolasma maclaughlinae* Jones, 2000  
 Genus *Pachylasma* Darwin, 1854

(continued)

Table 1 Continued

---

*Pachylasma scutistriata* Broch, 1922  
 Genus *Tetrapachylasma* Foster, 1988  
*Tetrapachylasma aurantiacum* (Darwin, 1854)  
*Tetrapachylasma ferrugomaculosa* Jones, 1993  
 Superfamily Chthamaloidea Darwin, 1854  
 Family Catophragmidae Utinomi, 1968  
 Genus *Catomerus* Pilsbry, 1916  
*Catomerus polymerus* (Darwin, 1854)  
 Family Chthamalidae Darwin, 1854  
 Subfamily Notochthamalinae Foster and Newman, 1987  
 Genus *Chamaesipho* Darwin, 1854  
*Chamaesipho tasmanica* Foster and Anderson, 1986  
*Nesochthamalus* Foster and Newman, 1987  
*Nesochthamalus intertextus* (Darwin, 1854)  
 Genus *Octomeris* Sowerby, 1825  
*Octomeris brunnea* Darwin, 1854  
*Octomeris intermedia* Nilsson-Cantell, 1921  
 Subfamily Euraphiinae Newman and Ross, 1976  
 Genus *Caudoeuraphia* Poltarukha, 1997  
*Caudoeuraphia caudata* (Pilsbry, 1916)  
 Genus *Euraphia* Conrad, 1837  
*Euraphia hembeli* Conrad, 1837  
*Microeuraphia* Poltarukha, 1997  
*Microeuraphia withersi* (Pilsbry, 1916)  
 Subfamily Chthamalinae Darwin, 1854  
 Genus *Chthamalus* Ranzani, 1817  
*Chthamalus antennatus* Darwin, 1854  
*Chthamalus malayensis* Pilsbry, 1916  
 Superfamily Coronuloidea Leach, 1817  
 Family Chelonibiidae Pilsbry, 1916  
 Subfamily Chelonibiinae Pilsbry, 1916  
 Genus *Chelonibia* Leach, 1817  
*Chelonibia caretta* (Spengler, 1790)  
*Chelonibia patula* (Ranzani, 1818)  
*Chelonibia testudinaria* (Linnaeus, 1758)  
 Family Platylepadidae Newman and Ross, 1976  
 Genus *Platylepas* Gray, 1825  
*Platylepas coriacea* Monroe and Limpus, 1979  
*Platylepas decorata* Darwin, 1854  
*Platylepas hexastylos* (Fabricius, 1798)  
*Platylepas ophiophilus* Lanchester, 1902  
 Genus *Stomatolepas* Pilsbry, 1910  
*Stomatolepas dermochelys* Monroe and Limpus, 1979  
*Stomatolepas elegans* (Costa, 1838)  
*Stomatolepas praegustator* Pilsbry, 1910

---

(continued)

Table 1 Continued

---

*Stomatolepas transversa* Nilsson-Cantell, 1930  
 Genus *Cylindrolepas* Pilsbry, 1916  
*Cylindrolepas darwiniana* Pilsbry, 1916  
 Genus *Stephanolepas* Fischer, 1886  
*Stephanolepas muricata* Fischer, 1886  
 Family Coronulidae Leach, 1817  
 Genus *Coronula* Lamarck, 1802  
*Coronula diadema* (Linnaeus, 1767)  
*Coronula reginae* (Darwin, 1854)  
 Genus *Cetopirus* Ranzani, 1817  
*Cetopirus complanatus* (Mörch, 1852)  
*Chelolepas* Ross and Frick, 2007  
*Chelolepas cheloniae* (Monroe and Limpus, 1979)  
 Genus *Tubicinella* Lamarck, 1802  
*Tubicinella major* Lamarck, 1802  
 Genus *Xenobalanus* Steenstrup, 1852  
*Xenobalanus globicipitus* Steenstrup, 1852  
 Superfamily Tetracitoidea Gruvel, 1903  
 Family Tetracitidae Gruvel, 1903  
 Subfamily Austrobalaninae Newman and Ross, 1976  
 Genus *Austrobalanus* Pilsbry, 1916  
*Austrobalanus imperator* (Darwin, 1854)  
 Genus *Epopella* Ross, 1970  
*Epopella simplex* (Darwin, 1854)  
 Subfamily Tetracitellinae Newman and Ross, 1976  
 Genus *Tetracitella* Hiro, 1939  
*Tetracitella costata* (Darwin, 1854)  
*Tetracitella divisa* (Nilsson-Cantell, 1921)  
*Tetracitella multicostata* (Nilsson-Cantell, 1930)  
*Tetracitella pilsbryi* Utinomi, 1962  
*Tetracitella purpurascens* (Wood, 1815)  
 Subfamily Newmanellinae Ross and Perreault, 1999  
 Genus *Yamaguchiella* Ross and Perreault, 1999  
 Subgenus *Yamaguchiella* Ross and Perreault, 1999  
*Yamaguchiella Yamaguchiella coerulescens* (Spengler, 1790)  
 Subgenus *Neonrosella* Jones, 2010  
*Yamaguchiella Neonrosella vitata* (Darwin, 1854)  
 Subfamily Tetracitinae Gruvel, 1903  
 Genus *Tesseropora* Pilsbry, 1916  
*Tesseropora rapax* Jones, 1993  
*Tesseropora rosea* (Krauss, 1848)  
*Tesseropora wireni* (Nilsson-Cantell, 1921)  
 Genus *Tetracita* Schumacher, 1817  
*Tetracita squamosa* (Bruguère, 1789)  
 Superfamily Balanoidea Leach, 1817

---

(continued)

Table 1 Continued

Family Archaeobalanidae Newman and Ross, 1976  
 Subfamily Archaeobalaninae Newman and Ross, 1976  
 Genus *Armatobalanus* Hoek, 1913  
*Armatobalanus allium* (Darwin, 1854)  
*Armatobalanus arcuatum* Hoek, 1913  
*Armatobalanus cepa* (Darwin, 1854)  
*Armatobalanus filigranus* (Broch, 1916)  
*Armatobalanus quadrivittatus* (Darwin, 1854)  
*Armatobalanus quinquivittatus* (Hoek, 1913)  
*Armatobalanus terebratus* (Darwin, 1854)  
 Genus *Striatobalanus* Hoek, 1913  
*Striatobalanus amaryllis* (Darwin, 1854)  
*Striatobalanus bimae* (Hoek, 1913)  
*Striatobalanus krugeri* (Pilsbry, 1916)  
*Striatobalanus tenuis* (Hoek, 1883)  
 Genus *Solidobalanus* Hoek, 1913  
*Solidobalanus auricoma* (Hoek, 1913)  
*Solidobalanus ciliatus* (Hoek, 1913)  
*Solidobalanus compressus* (Hoek, 1913)  
*Solidobalanus socialis* (Hoek, 1883)  
*Solidobalanus solidus* (Broch, 1931)  
 Genus *Membranobalanus* Hoek, 1913  
*Membranobalanus cuneiformis* (Hiro, 1936)  
 Genus *Conopea* Say, 1822  
*Conopea calceolus* (Ellis, 1758)  
*Conopea cymbiformis* (Darwin, 1854)  
*Conopea dentifer* (Broch, 1922)  
*Conopea mjobergi* (Broch, 1916)  
*Conopea navicula* (Darwin, 1854)  
 Subfamily Acastinae Kolbasov, 1993  
 Genus *Archiacasta* Kolbasov, 1993  
*Archiacasta spinitergum* (Broch, 1931)  
 Genus *Neocasta* Kolbasov, 1993  
*Neocasta glans* (Lamarck, 1818)  
*Neocasta laevigata* (Gray, 1825)  
 Genus *Euacasta* Kolbasov, 1993  
*Euacasta antipathidus* (Broch, 1916)  
*Euacasta dofleini* (Krüger, 1911)  
*Euacasta porata* (Nilsson-Cantell, 1921)  
*Euacasta zuiho* (Hiro, 1936)  
 Genus *Acasta* Leach, 1817  
*Acasta conica* Hoek, 1913  
*Acasta cyathus* Darwin, 1854  
*Acasta echinata* Hiro, 1937a  
*Acasta fenestrata* Darwin, 1854  
*Acasta hirsuta* Broch, 1916

(continued)

Table 1 Continued

*Acasta idiopoma* Pilsbry, 1912  
*Acasta japonica* Pilsbry, 1911  
*Acasta purpurata* Darwin, 1854  
*Acasta spongites* (Poli, 1795)  
*Acasta sulcata* Lamarck, 1818 [includes *Acasta serrata* Hiro, 1937b]  
 Genus *Pectinoacasta* Kolbasov, 1993  
*Pectinoacasta pectinipes* (Pilsbry, 1912)  
 Subfamily Elminiinae Foster, 1982  
 Genus *Hexaminus* Foster, 1982  
*Hexaminus foliorum* Anderson et al., 1988  
*Hexaminus popeiana* Foster, 1982  
*Austrominus* Buckeridge, 1983  
*Austrominus adelaidae* (Bayliss, 1988)  
*Austrominus covertus* (Foster, 1982)  
*Austrominus erubescens* (Bayliss, 1994)  
*Austrominus flindersi* (Bayliss, 1994)  
*Austrominus modestus* (Darwin, 1854)  
*Austrominus placidus* (Bayliss, 1994)  
 Family Pyrgomatidae Gray, 1825  
 Subfamily Pyrgomatinae Gray, 1825  
 Tribe Hoekiini Ross and Newman, 1995  
 Genus *Australhoekia* Ross and Newman, 1995  
*Australhoekia cardenae* Ross and Newman, 2000  
 Tribe Pyrgomatini Ross and Newman, 1995  
 Genus *Cantellius* Ross and Newman, 1973  
*Cantellius acutum* (Hiro, 1938)  
*Cantellius euspinulosum* (Broch, 1931)  
*Cantellius gregarius* (Sowerby, 1823)  
*Cantellius iwayama* (Hiro, 1938)  
*Cantellius pallidus* (Broch, 1931)  
*Cantellius secundus* (Broch, 1931)  
*Cantellius septimus* (Hiro, 1938)  
*Cantellius sumbawae* Hoek, 1913  
*Cantellius tredecimus* (Kolosváry, 1947)  
 Genus *Creusia* Leach, 1817  
*Creusia spinulosa* Leach, 1818  
 Genus *Galkinia* Ross and Newman, 1995  
*Galkinia indica* (Annandale, 1924)  
 Genus *Hiroa* Ross and Newman, 1973  
*Hiroa stubbingsi* Ross and Newman, 1973  
 Genus *Darwiniella* Anderson, 1992  
*Darwiniella conjugatum* (Darwin, 1854)  
 Genus *Nobia* Sowerby, 1823  
*Nobia grandis* Sowerby, 1839  
 Genus *Arossella* Anderson, 1993  
*Arossella projectum* (Nilsson-Cantell, 1938)

(continued)



Table 1 Continued

---

|                                                              |
|--------------------------------------------------------------|
| Genus <i>Pyrgoma</i> Leach, 1817                             |
| <i>Pyrgoma cancellata</i> Leach, 1818                        |
| Genus <i>Savignium</i> Leach, 1825                           |
| <i>Savignium crenatum</i> (Sowerby, 1823)                    |
| Genus <i>Trevathana</i> Anderson, 1992                       |
| <i>Trevathana dentatum</i> (Darwin, 1854)                    |
| Genus <i>Wanella</i> Anderson, 1993                          |
| <i>Wanella andersonorum</i> Ross, 1999                       |
| <i>Wanella milleporae</i> (Darwin, 1854)                     |
| Subfamily Megatrematinae Holthuis, 1982                      |
| Tribe Pyrgomini Ross and Pitombo, 2002                       |
| Genus <i>Pyrgomina</i> Ross and Pitombo, 2002                |
| <i>Pyrgomina djanae</i> Ross and Pitombo, 2002               |
| Family Balanidae Leach, 1817                                 |
| Subfamily Amphibalaninae Pitombo, 2004                       |
| Genus <i>Amphibalanus</i> Pitombo, 2004                      |
| <i>Amphibalanus amphitrite</i> (Darwin, 1854)                |
| <i>Amphibalanus cirratus</i> (Darwin, 1854)                  |
| <i>Amphibalanus improvisus</i> (Darwin, 1854)                |
| <i>Amphibalanus littoralis</i> (Ren and Liu, 1978)           |
| <i>Amphibalanus poecilotheca</i> (Krüger, 1911)              |
| <i>Amphibalanus reticulatus</i> Utinomi, 1967b               |
| <i>Amphibalanus variegatus</i> Darwin, 1854                  |
| <i>Amphibalanus zhuijiangensis</i> (Ren, 1989)               |
| Subfamily Balaninae Leach, 1817                              |
| Genus <i>Balanus</i> Da Costa, 1778                          |
| <i>Balanus trigonus</i> Darwin, 1854                         |
| Genus <i>Fistulobalanus</i> Zullo, 1984                      |
| <i>Fistulobalanus albicostatus</i> (Pilsbry, 1916)           |
| <i>Fistulobalanus pallidus</i> (Darwin, 1854)                |
| Subfamily Megabalaninae Newman, 1979                         |
| Genus <i>Austromegabalanus</i> Newman, 1979                  |
| <i>Austromegabalanus nigrescens</i> (Lamarck, 1818)          |
| Genus <i>Megabalanus</i> Hoek, 1913                          |
| <i>Megabalanus ajax</i> (Darwin, 1854)                       |
| <i>Megabalanus coccopoma</i> (Darwin, 1854)                  |
| <i>Megabalanus concinnus</i> (Darwin, 1854)                  |
| <i>Megabalanus occator</i> (Darwin, 1854)                    |
| <i>Megabalanus rosa</i> (Pilsbry, 1916)                      |
| <i>Megabalanus tintinnabulum</i> (Linnaeus, 1758)            |
| <i>Megabalanus validus</i> (Darwin, 1854)                    |
| <i>Megabalanus volcano</i> (Pilsbry, 1916)                   |
| <i>Megabalanus zebra</i> (Darwin, 1854)                      |
| Genus <i>Notomegabalanus</i> Newman, 1979                    |
| <i>Notomegabalanus algicola</i> (Pilsbry, 1916)              |
| <i>Notomegabalanus krakatauensis</i> (Nilsson-Cantell, 1934) |

---

45 IWP and 25 IM species, and 6 AE species (Jones 2003).

More specifically, the fauna of the vast and poorly studied Kimberley region of WA (13°44'S–18°00'S, 126°47'E–122°15' E) contains 56 shallow-water species in 22 genera within eight families presently documented (Jones 1992a; Jones and Hewitt 1997), including 2 C, 46 IWP, 7 IM, and 1 AE species (Jones 2003). At the Dampier Archipelago (20°20'S–20°45'S, 116°24'E–117°05'E), 49 species in 24 genera within 11 families, including 10 C, 27 IWP, and 8 IM species, and 4 AE species are recorded (Jones 2003, 2004). In the North West Cape area, 44 species in 20 genera within 11 families have been documented from the Montebello Islands (20°27'S 115°31'E), the Muiron Islands (21.66°S 114.32°E) and the eastern shores of Exmouth Gulf (21° 55'S 114°23'E) (Jones and Hewitt 1996; Jones and Berry 2000), including 4 C, 38 IWP, and 2 IM species, no AE species being recorded (Jones 2003, 2004).

*Tetraclita squamosa* (Bruguière 1789) and *Caudoeuraphia caudata* (Pilsbry 1916) are examples of tropical barnacles commonly occurring in the littoral across the northern Australian tropical province. *Tetraclita squamosa* extends from Red Bluff, Kalbarri, WA (27°54'S 114°26'E), across the NT to Point Vernon, Qld (25°14' 53 S, 152° 49'E) (Jones 1992a, 2004, 2010). Similarly, *C. caudata* extends from the Dampier Archipelago, WA (20°20'S 116°24'E), to Point Vernon (Jones 2004, 2010). Examples of tropical endemic species are *Calantica darwini* Jones and Hosie (2009) collected north of Port Hedland, WA (18°30'S 118°36E to 18°31'S 118°37'E, depth 196 km) and *Crosnierella acantho-subcarinae* (Jones 1998) from northeastern Qld (22°27'S 152°15'E, depth 175m) (Jones 1998; Jones and Hosie 2009).

### Southern Australian temperate province

The southern Australian temperate barnacle fauna exhibits lower species diversity, a low incidence of tropical species, and high endemism of species. It comprises 129 species, of which 37 are C and 26 have IWP, 10 have WP, and 25 have IM affinities. Six species have AA and 2 have SAA affinities, and 23 are AE (Tables 2 and 3).

In south-western Australia, 44 barnacle species in 24 genera and 12 families have been recorded (Jones 1990b, 2003), with 21 being C, and 10 I with WP and 3 with IM affinities. Seven are AE species and three have AA affinities. At Albany (35°02'S 117°54'E), of 31 species documented, three are

Table 2 Biogeographic affinities of Australian barnacles

| Genus              | Species                          | Biogeographic affinities |     |    |    |    |    |     |
|--------------------|----------------------------------|--------------------------|-----|----|----|----|----|-----|
|                    |                                  | C                        | IWP | WP | IM | AE | AA | SAA |
| <i>Ibla</i>        | <i>cumingi</i>                   |                          | IWP |    |    |    |    |     |
|                    | <i>quadrivalvis</i>              |                          |     |    |    | AE |    |     |
| <i>Idioibla</i>    | <i>pygmaea</i>                   |                          |     |    |    | AE |    |     |
| <i>Chaetolepas</i> | <i>calcitergum</i>               |                          |     |    |    | AE |    |     |
| <i>Heteralepas</i> | <i>adiposa</i>                   |                          |     | WP |    |    |    |     |
|                    | <i>cornuta</i>                   | C                        |     |    |    |    |    |     |
|                    | <i>dubia</i>                     |                          |     |    |    |    | AA |     |
|                    | <i>japonica</i>                  |                          | IWP |    |    |    |    |     |
|                    | <i>utinomi</i>                   |                          |     |    |    | AE |    |     |
| <i>Paralepas</i>   | <i>dannevigi</i>                 |                          |     |    | IM |    |    |     |
|                    | <i>georgei</i>                   |                          |     |    |    | AE |    |     |
|                    | <i>intermedia</i>                |                          |     |    | IM |    |    |     |
|                    | <i>minuta</i>                    | C                        |     |    |    |    |    |     |
|                    | <i>morula</i>                    |                          |     |    | IM |    |    |     |
|                    | <i>palinuri urae</i>             |                          |     | WP |    |    |    |     |
|                    | <i>pedunculata</i>               |                          |     | WP |    |    |    |     |
|                    | <i>quadrata</i>                  |                          |     |    | IM |    |    |     |
|                    | <i>scyllarusi</i>                |                          |     | WP |    |    |    |     |
|                    | <i>tuberosa</i>                  |                          |     | WP |    |    |    |     |
| <i>Arcalepas</i>   | <i>brucei</i>                    |                          |     |    |    | AE |    |     |
| <i>Oxynaspis</i>   | <i>celata</i>                    | C                        |     |    |    |    |    |     |
| <i>Poecilasma</i>  | <i>dubium</i>                    |                          | IWP |    |    |    |    |     |
|                    | <i>kaempferi</i>                 | C                        |     |    |    |    |    |     |
| <i>Glyptelasma</i> | <i>carinatum</i>                 | C                        |     |    |    |    |    |     |
|                    | <i>gigas</i>                     |                          |     |    | IM |    |    |     |
|                    | <i>gracile</i>                   |                          |     |    | IM |    |    |     |
|                    | <i>hamatum</i>                   | C                        |     |    |    |    |    |     |
|                    | <i>orientale</i>                 |                          |     |    | IM |    |    |     |
|                    | <i>pilsbryi</i>                  | C                        |     |    |    |    |    |     |
|                    | <i>rectum</i>                    | C                        |     |    |    |    |    |     |
| <i>Megalasma</i>   | <i>minus</i>                     | C                        |     |    |    |    |    |     |
|                    | <i>striatum</i>                  |                          | IWP |    |    |    |    |     |
| <i>Temnaspis</i>   | <i>amygdalum</i>                 |                          | IWP |    |    |    |    |     |
|                    | <i>bathynomi</i>                 |                          |     |    | IM |    |    |     |
|                    | <i>excavatum</i>                 |                          | IWP |    |    |    |    |     |
|                    | <i>fissum</i>                    |                          | IWP |    |    |    |    |     |
|                    | <i>kilepoe</i>                   |                          | IWP |    |    |    |    |     |
|                    | <i>tridens</i>                   | C                        |     |    |    |    |    |     |
|                    | <i>tridens asymmetrica</i>       |                          |     |    | IM |    |    |     |
| <i>Octolasmis</i>  | <i>angulata</i>                  |                          | IWP |    |    |    |    |     |
|                    | <i>aymonini</i>                  |                          |     |    | IM |    |    |     |
|                    | <i>cf bullata</i>                |                          |     |    | IM |    |    |     |
|                    | <i>clubii</i>                    |                          |     |    | IM |    |    |     |
|                    | <i>cor</i>                       |                          | IWP |    |    |    |    |     |
|                    | <i>geryonophila geryonophila</i> | C                        |     |    |    |    |    |     |
|                    | <i>hawaiense</i>                 |                          |     | WP |    |    |    |     |
|                    | <i>hoeki</i>                     | C                        |     |    |    |    |    |     |

(continued)

Table 2 Continued

| Genus                           | Species                              | Biogeographic affinities |     |    |    |    |     |     |
|---------------------------------|--------------------------------------|--------------------------|-----|----|----|----|-----|-----|
|                                 |                                      | C                        | IWP | WP | IM | AE | AA  | SAA |
|                                 | <i>indubia</i>                       |                          | IWP |    |    |    |     |     |
|                                 | <i>lowei</i>                         | C                        |     |    |    |    |     |     |
|                                 | <i>neptuni neptuni</i>               |                          | IWP |    |    |    |     |     |
|                                 | <i>nierstraszi</i>                   |                          | IWP |    |    |    |     |     |
|                                 | <i>scuticosta</i>                    |                          |     |    | IM |    |     |     |
|                                 | <i>warwickii</i>                     |                          | IWP |    |    |    |     |     |
|                                 | <i>weberi</i>                        |                          | IWP |    |    |    |     |     |
|                                 | <i>Dichelaspis orthogonia</i>        |                          | IWP |    |    |    |     |     |
|                                 | <i>Trilasmis eburnea</i>             |                          | IWP |    |    |    |     |     |
|                                 | <i>Lepas (Nonfurcata) nonfurcata</i> |                          | IWP |    |    |    |     |     |
| <i>Lepas (Anatifa)</i>          | <i>anatifera anatifera</i>           | C                        |     |    |    |    |     |     |
|                                 | <i>anatifera dentata</i>             | C                        |     |    |    |    |     |     |
|                                 | <i>anatifera striata</i>             | C                        |     |    |    |    |     |     |
|                                 | <i>anserifera</i>                    | C                        |     |    |    |    |     |     |
|                                 | <i>australis</i>                     | C                        |     |    |    |    |     |     |
|                                 | <i>hillii</i>                        | C                        |     |    |    |    |     |     |
|                                 | <i>Indica</i>                        |                          | IWP |    |    |    |     |     |
|                                 | <i>pectinata</i>                     | C                        |     |    |    |    |     |     |
|                                 | <i>testudinata</i>                   | C                        |     |    |    |    |     |     |
|                                 | <i>Dosima fascicularis</i>           | C                        |     |    |    |    |     |     |
| <i>Conchoderma</i>              | <i>auritum</i>                       | C                        |     |    |    |    |     |     |
|                                 | <i>chelonophilum</i>                 | C                        |     |    |    |    |     |     |
|                                 | <i>hunteri</i>                       |                          | IWP |    |    |    |     |     |
|                                 | <i>virgatum</i>                      | C                        |     |    |    |    |     |     |
|                                 | <i>Alepas pacifica</i>               |                          | IWP |    |    |    |     |     |
| <i>Calantica</i>                | <i>affinis</i>                       |                          |     |    |    |    | IM  |     |
|                                 | <i>darwinii</i>                      |                          |     |    |    |    |     | AE  |
|                                 | <i>studerii</i>                      |                          |     |    |    |    | IM  |     |
|                                 | <i>trispinosa</i>                    |                          |     |    |    |    | IM  |     |
|                                 | <i>Crosnierella acanthosubarinae</i> |                          |     |    |    |    |     | AE  |
| <i>Scillaelepas cf fosteri</i>  |                                      |                          | WP  |    |    |    |     |     |
| <i>Smilium nudipes</i>          |                                      |                          |     | IM |    |    |     |     |
|                                 | <i>peronii</i>                       |                          |     |    | IM |    |     |     |
|                                 | <i>sinense</i>                       |                          |     |    | IM |    |     |     |
|                                 | <i>zancleanum</i>                    |                          |     |    | IM |    |     |     |
|                                 | <i>Lithotrya dorsalis</i>            | C                        |     |    |    |    |     |     |
|                                 | <i>nicobarica</i>                    |                          | IWP |    |    |    |     |     |
|                                 | <i>valentiana</i>                    |                          | IWP |    |    |    |     |     |
| <i>Scalpellum</i>               | <i>inermis</i>                       |                          |     |    | IM |    |     |     |
|                                 | <i>stearnsii</i>                     |                          | IWP |    |    |    |     |     |
| <i>Litoscalpellum</i>           | <i>giganteum</i>                     | C                        |     |    |    |    |     |     |
|                                 | <i>intermedium</i>                   |                          |     | WP |    |    |     |     |
|                                 | <i>juddi</i>                         |                          |     |    | IM |    |     |     |
|                                 | <i>nipponense</i>                    |                          |     | WP |    |    |     |     |
| <i>Alcockianum</i>              | <i>alcockianum</i>                   |                          | IWP |    |    |    |     |     |
|                                 | <i>persona</i>                       |                          |     |    | IM |    |     |     |
| <i>Gymnoscalpellum tarasovi</i> |                                      |                          |     |    |    |    | SAA |     |

(continued)

Table 2 Continued

| Genus                      | Species               | Biogeographic affinities |     |    |    |    |     |     |
|----------------------------|-----------------------|--------------------------|-----|----|----|----|-----|-----|
|                            |                       | C                        | IWP | WP | IM | AE | AA  | SAA |
| <i>Annandaleum</i>         | <i>laccadivicum</i>   |                          | IWP |    |    |    |     |     |
|                            | <i>lambda</i>         |                          | IWP |    |    |    |     |     |
| <i>Arcoscalpellum</i>      | <i>dubium</i>         |                          |     | WP |    |    |     |     |
|                            | <i>gryllum</i>        |                          |     |    |    | AE |     |     |
|                            | <i>inum</i>           |                          |     |    |    | AE |     |     |
|                            | <i>mendeleevi</i>     |                          |     |    |    | AE |     |     |
|                            | <i>pertosum</i>       |                          |     |    | IM |    |     |     |
|                            | <i>sociabile</i>      |                          | IWP |    |    |    |     |     |
| <i>Planoscalpellum</i>     | <i>truncatum</i>      |                          |     |    | IM |    |     |     |
|                            | <i>planum</i>         |                          |     |    | IM |    |     |     |
| <i>Weltnerium</i>          | <i>poculum</i>        |                          |     |    | IM |    |     |     |
| <i>Verum</i>               | <i>australicum</i>    |                          |     |    | IM |    |     |     |
|                            | <i>candidum</i>       |                          |     |    | IM |    |     |     |
|                            | <i>novaezelandiae</i> |                          | IWP |    |    |    |     |     |
|                            | <i>proclive</i>       |                          |     |    | IM |    |     |     |
|                            | <i>virgatum</i>       |                          |     |    | IM |    |     |     |
| <i>Anguloscalpellum</i>    | <i>pedunculatum</i>   |                          |     | WP |    |    |     |     |
| <i>Amigdoscalpellum</i>    | <i>costellatum</i>    | C                        |     |    |    |    |     |     |
|                            | <i>daschae</i>        |                          |     | WP |    |    |     |     |
|                            | <i>elegans</i>        |                          | IWP |    |    |    |     |     |
|                            | <i>torbenwolffi</i>   |                          |     | WP |    |    |     |     |
|                            | <i>vitreum</i>        |                          | IWP |    |    |    |     |     |
| <i>Trianguloscalpellum</i> | <i>annandalei</i>     |                          | IWP |    |    |    |     |     |
|                            | <i>hamulus</i>        |                          |     |    | IM |    |     |     |
|                            | <i>hirsutum</i>       |                          |     |    | IM |    |     |     |
|                            | <i>micelottianum</i>  | C                        |     |    |    |    |     |     |
|                            | <i>moluccanum</i>     |                          |     |    | IM |    |     |     |
|                            | <i>regium regium</i>  | C                        |     |    |    |    |     |     |
| <i>Teloscalpellum</i>      | <i>rubrum</i>         |                          |     |    | IM |    |     |     |
|                            | <i>ecaudatum</i>      |                          |     |    | IM |    |     |     |
|                            | <i>gracile</i>        |                          |     |    | IM |    | SAA |     |
| <i>laticulum</i>           | <i>latisculum</i>     |                          |     |    |    |    |     |     |
|                            | <i>gibbosa</i>        | C                        |     |    |    |    |     |     |
| <i>navicula</i>            | <i>navicula</i>       |                          | IWP |    |    |    |     |     |
|                            | <i>pacifica</i>       |                          | IWP |    |    |    |     |     |
| <i>Cristallinaverruca</i>  | <i>crystallina</i>    |                          | IWP |    |    |    |     |     |
| <i>Metaverruca</i>         | <i>halotheca</i>      |                          | IWP |    |    |    |     |     |
|                            | <i>sculpta</i>        |                          | IWP |    |    |    |     |     |
| <i>Newmaniverruca</i>      | <i>albatrossiana</i>  |                          | IWP |    |    |    |     |     |
| <i>Rostratoverruca</i>     | <i>intexta</i>        |                          | IWP |    |    |    |     |     |
| <i>Bathylasma</i>          | <i>alearum</i>        |                          |     | WP |    |    |     |     |
| <i>Tetrachaelasma</i>      | <i>tasmanicum</i>     |                          |     | WP |    |    |     |     |
| <i>Hexelasma</i>           | <i>arafuriae</i>      |                          |     |    | IM |    |     |     |
|                            | <i>nolearia</i>       |                          |     |    |    | AA |     |     |
| <i>Eutomolasma</i>         | <i>chinense</i>       |                          |     |    | IM |    |     |     |
|                            | <i>japonicum</i>      |                          |     | WP |    |    |     |     |
|                            | <i>maclaughlinae</i>  |                          | IWP |    |    |    |     |     |
| <i>Pachylasma</i>          | <i>scutistriata</i>   |                          | IWP |    |    |    |     |     |

(continued)

Table 2 Continued

| Genus                  | Species                      | Biogeographic affinities |     |     |    |    |    |     |
|------------------------|------------------------------|--------------------------|-----|-----|----|----|----|-----|
|                        |                              | C                        | IWP | WP  | IM | AE | AA | SAA |
| <i>Tetrapachylasma</i> | <i>aurantiacum</i>           |                          |     | WP  |    |    |    |     |
|                        | <i>ferrugomaculosa</i>       |                          |     |     |    |    | AE |     |
| <i>Catomerus</i>       | <i>polymerus</i>             |                          |     |     |    |    | AE |     |
| <i>Chamaesipho</i>     | <i>tasmanica</i>             |                          |     |     |    |    | AE |     |
| <i>Nesochthamalus</i>  | <i>intertextus</i>           |                          |     | IWP |    |    |    |     |
| <i>Octomeris</i>       | <i>brunnea</i>               |                          |     | IWP |    |    |    |     |
|                        | <i>intermedia</i>            |                          |     |     |    |    | IM |     |
| <i>Caudoeuraphia</i>   | <i>caudata</i>               |                          |     |     |    |    | IM |     |
| <i>Euraphia</i>        | <i>hembeli</i>               |                          |     | IWP |    |    |    |     |
| <i>Microeuraphia</i>   | <i>withersi</i>              |                          |     | IWP |    |    |    |     |
| <i>Chthamalus</i>      | <i>antennatus</i>            |                          |     |     |    |    | AE |     |
|                        | <i>malayensis</i>            |                          |     | IWP |    |    |    |     |
| <i>Chelonibia</i>      | <i>caretta</i>               | C                        |     |     |    |    |    |     |
|                        | <i>patula</i>                | C                        |     |     |    |    |    |     |
|                        | <i>testudinaria</i>          | C                        |     |     |    |    |    |     |
| <i>Platylepas</i>      | <i>coriacea</i>              |                          |     | IWP |    |    |    |     |
|                        | <i>decorata</i>              |                          |     | IWP |    |    |    |     |
| <i>Stomatolepas</i>    | <i>hexastylus</i>            | C                        |     |     |    |    |    |     |
|                        | <i>ophiophilus</i>           |                          |     | IWP |    |    |    |     |
| <i>dermochelys</i>     | <i>dermochelys</i>           | C                        |     |     |    |    |    |     |
|                        | <i>elegans</i>               | C                        |     |     |    |    |    |     |
|                        | <i>praegustator</i>          | C                        |     |     |    |    |    |     |
|                        | <i>transversa</i>            |                          |     |     |    |    | IM |     |
|                        | <i>darwiniana</i>            | C                        |     |     |    |    |    |     |
| <i>Stephanolepas</i>   | <i>muricata</i>              |                          |     |     |    |    | IM |     |
| <i>Coronula</i>        | <i>diadema</i>               | C                        |     |     |    |    |    |     |
|                        | <i>reginae</i>               | C                        |     |     |    |    |    |     |
| <i>Cetopirus</i>       | <i>complanatus</i>           | C                        |     |     |    |    |    |     |
| <i>Chelolepas</i>      | <i>cheloniae</i>             |                          |     |     |    |    | IM |     |
| <i>Tubicinella</i>     | <i>major</i>                 | C                        |     |     |    |    |    |     |
| <i>Xenobalanus</i>     | <i>globicipitus</i>          | C                        |     |     |    |    |    |     |
| <i>Austrobalanus</i>   | <i>imperator</i>             |                          |     |     |    |    | AE |     |
| <i>Epopella</i>        | <i>simplex</i>               |                          |     |     |    |    | AE |     |
| <i>Tetraclitella</i>   | <i>costata</i>               |                          |     |     |    |    | IM |     |
|                        | <i>divisa</i>                |                          |     |     |    |    | IM |     |
|                        | <i>multicostata</i>          |                          |     |     |    |    | IM |     |
|                        | <i>pilsbryi</i> <sup>a</sup> |                          |     |     |    |    | IM |     |
| <i>Yamaguchiella</i>   | <i>purpurascens</i>          |                          |     |     |    |    |    | AA  |
|                        | <i>coerulescens</i>          |                          |     | IWP |    |    |    |     |
| <i>Tesseropora</i>     | <i>vitiata</i>               |                          |     | IWP |    |    |    |     |
|                        | <i>rapax</i>                 |                          |     |     |    |    | AE |     |
| <i>rosea</i>           | <i>rosea</i>                 |                          |     |     |    |    |    | AA  |
|                        | <i>wireni</i>                |                          |     |     |    |    | IM |     |
| <i>Tetraclita</i>      | <i>squamosa</i>              |                          |     | IWP |    |    |    |     |
| <i>Armatobalanus</i>   | <i>allium</i>                |                          |     | IWP |    |    |    |     |
|                        | <i>arcuatum</i>              |                          |     |     |    |    | IM |     |
|                        | <i>cepa</i>                  |                          |     | IWP |    |    |    |     |
| <i>filigranus</i>      |                              |                          | IWP |     |    |    |    |     |

(continued)

Table 2 Continued

| Genus           | Species                     | Biogeographic affinities |     |    |    |    |    |     |
|-----------------|-----------------------------|--------------------------|-----|----|----|----|----|-----|
|                 |                             | C                        | IWP | WP | IM | AE | AA | SAA |
| Striatobalanus  | <i>quadrivittatus</i>       |                          | IWP |    |    |    |    |     |
|                 | <i>quinqvittatus</i>        |                          |     |    | IM |    |    |     |
|                 | <i>terebratus</i>           |                          | IWP |    |    |    |    |     |
|                 | <i>amaryllis</i>            |                          | IWP |    |    |    |    |     |
|                 | <i>bimae</i>                |                          |     |    | IM |    |    |     |
|                 | <i>krugeri</i> <sup>a</sup> |                          |     |    | IM |    |    |     |
| Solidobalanus   | <i>tenuis</i>               |                          | IWP |    |    |    |    |     |
|                 | <i>auricoma</i>             | C                        |     |    |    |    |    |     |
|                 | <i>ciliatus</i>             |                          | IWP |    |    |    |    |     |
|                 | <i>compressus</i>           |                          |     |    | IM |    |    |     |
| Membranobalanus | <i>socialis</i>             |                          | IWP |    |    |    |    |     |
|                 | <i>solidus</i>              |                          |     |    | IM |    |    |     |
|                 | <i>cuneiformis</i>          |                          |     |    | IM |    |    |     |
| Conopea         | <i>calceolus</i>            | C                        |     |    |    |    |    |     |
|                 | <i>cymbiformis</i>          |                          | IWP |    |    |    |    |     |
|                 | <i>dentifer</i>             |                          | IWP |    |    |    |    |     |
|                 | <i>mjobergi</i>             |                          | IWP |    |    |    |    |     |
|                 | <i>navicula</i>             |                          | IWP |    |    |    |    |     |
| Archiacasta     | <i>spinitergum</i>          |                          |     |    | IM |    |    |     |
| Neocasta        | <i>glans</i>                |                          | IWP |    |    |    |    |     |
|                 | <i>laevigata</i>            |                          | IWP |    |    |    |    |     |
| Euacasta        | <i>antipathidus</i>         |                          |     |    |    | AE |    |     |
|                 | <i>dofleini</i>             |                          |     |    | IM |    |    |     |
|                 | <i>porata</i>               |                          |     |    | IM |    |    |     |
|                 | <i>zuiho</i>                |                          |     |    | IM |    |    |     |
| Acasta          | <i>conica</i>               |                          |     |    | IM |    |    |     |
|                 | <i>cyathus</i>              | C                        |     |    |    |    |    |     |
|                 | <i>echinata</i>             |                          |     |    | IM |    |    |     |
|                 | <i>fenestrata</i>           |                          | IWP |    |    |    |    |     |
|                 | <i>hirsuta</i>              |                          |     |    | IM |    |    |     |
|                 | <i>idiopoma</i>             |                          |     |    | IM |    |    |     |
|                 | <i>japonica</i>             |                          |     |    | IM |    |    |     |
|                 | <i>purpurata</i>            |                          |     |    | IM |    |    |     |
|                 | <i>spongites</i>            | C                        |     |    |    |    |    |     |
|                 | <i>sulcata</i>              |                          | IWP |    |    |    |    |     |
| Pectinoacasta   | <i>pectinipes</i>           |                          | IWP |    |    |    |    |     |
| Hexaminus       | <i>foliorum</i>             |                          |     |    |    | AE |    |     |
|                 | <i>popeiana</i>             |                          |     |    |    | AE |    |     |
| Austrominus     | <i>adelaidae</i>            |                          |     |    |    | AE |    |     |
|                 | <i>covertus</i>             |                          |     |    |    | AE |    |     |
|                 | <i>erubescens</i>           |                          |     |    |    | AE |    |     |
|                 | <i>flindersi</i>            |                          |     |    |    | AE |    |     |
|                 | <i>modestus</i>             |                          |     |    |    |    | AA |     |
|                 | <i>placidus</i>             |                          |     |    |    | AE |    |     |
| Australhoekia   | <i>cardenae</i>             |                          |     |    | WP |    |    |     |
| Cantellius      | <i>acutum</i>               |                          |     |    | WP |    |    |     |
|                 | <i>euspinulosum</i>         |                          | IWP |    |    |    |    |     |
|                 | <i>gregarius</i>            |                          |     |    | IM |    |    |     |

(continued)

Table 2 Continued

| Genus             | Species                           | Biogeographic affinities |           |           |           |           |           |          |          |
|-------------------|-----------------------------------|--------------------------|-----------|-----------|-----------|-----------|-----------|----------|----------|
|                   |                                   | C                        | IWP       | WP        | IM        | AE        | AA        | SAA      |          |
|                   | <i>ipayama</i>                    |                          |           |           |           |           | WP        |          |          |
|                   | <i>pallidus</i>                   |                          | IWP       |           |           |           |           |          |          |
|                   | <i>secundus</i>                   |                          | IWP       |           |           |           |           |          |          |
|                   | <i>septimus</i>                   |                          | IWP       |           |           |           |           |          |          |
|                   | <i>sumbawae</i>                   |                          |           |           |           | IM        |           |          |          |
|                   | <i>tredecimus</i>                 |                          | IWP       |           |           |           |           |          |          |
| Creusia           | <i>spinulosa</i>                  |                          | IWP       |           |           |           |           |          |          |
| Galkinia          | <i>indica</i>                     |                          | IWP       |           |           |           |           |          |          |
| Hiroa             | <i>stubbingsi</i>                 |                          |           |           |           | WP        |           |          |          |
| Darwinella        | <i>conjugatum</i>                 |                          | IWP       |           |           |           |           |          |          |
| Nobia             | <i>grandis</i>                    |                          | IWP       |           |           |           |           |          |          |
| Arossella         | <i>projectum</i>                  |                          |           |           |           | IM        |           |          |          |
| Pyrgoma           | <i>cancellata</i>                 |                          | IWP       |           |           |           |           |          |          |
| Savignium         | <i>crenatum</i>                   |                          | IWP       |           |           |           |           |          |          |
| Trevathana        | <i>dentatum</i>                   |                          | IWP       |           |           |           |           |          |          |
| Wanella           | <i>andersonorum</i>               |                          | IWP       |           |           |           |           |          |          |
|                   | <i>milleporae</i>                 |                          | IWP       |           |           |           |           |          |          |
| Pyrgominini       | <i>djanae</i>                     |                          |           |           |           |           | AE        |          |          |
| Amphibalanus      | <i>amphitrite</i>                 | C                        |           |           |           |           |           |          |          |
|                   | <i>cirratus</i>                   |                          | IWP       |           |           |           |           |          |          |
|                   | <i>improvisus</i> <sup>a</sup>    | C                        |           |           |           |           |           |          |          |
|                   | <i>littoralis</i> <sup>a</sup>    |                          |           |           |           | IM        |           |          |          |
|                   | <i>poecilotheca</i> <sup>a</sup>  |                          | IWP       |           |           |           |           |          |          |
|                   | <i>reticulatus</i> <sup>a</sup>   |                          |           |           |           | IM        |           |          |          |
|                   | <i>variegatus</i>                 |                          |           |           |           |           | AA        |          |          |
|                   | <i>zhujiangensis</i> <sup>a</sup> |                          |           |           |           | IM        |           |          |          |
| Balanus           | <i>trigonus</i>                   | C                        |           |           |           |           |           |          |          |
| Fistulobalanus    | <i>albicostatus</i> <sup>a</sup>  |                          | IWP       |           |           |           |           |          |          |
|                   | <i>pallidus</i>                   | C                        |           |           |           |           |           |          |          |
| Austromegabalanus | <i>nigrescens</i>                 |                          |           |           |           |           | AE        |          |          |
| Megabalanus       | <i>ajax</i>                       |                          | IWP       |           |           |           |           |          |          |
|                   | <i>coccopoma</i> <sup>a</sup>     | C                        |           |           |           |           |           |          |          |
|                   | <i>concinnus</i> <sup>a</sup>     |                          | IWP       |           |           |           |           |          |          |
|                   | <i>occator</i> <sup>a</sup>       |                          | IWP       |           |           |           |           |          |          |
|                   | <i>rosa</i> <sup>a</sup>          |                          |           |           |           | IM        |           |          |          |
|                   | <i>tintinnabulum</i>              | C                        |           |           |           |           |           |          |          |
|                   | <i>validus</i>                    |                          |           |           |           | IM        |           |          |          |
|                   | <i>volcano</i> <sup>a</sup>       |                          |           |           |           | IM        |           |          |          |
|                   | <i>zebra</i> <sup>a</sup>         |                          | IWP       |           |           |           |           |          |          |
| Notomegabalanus   | <i>algicola</i> <sup>a</sup>      |                          | IWP       |           |           |           |           |          |          |
|                   | <i>krakatauensis</i> <sup>a</sup> |                          |           |           |           |           | IA        |          |          |
| <b>TOTAL</b>      | <b>279</b>                        |                          | <b>54</b> | <b>92</b> | <b>21</b> | <b>76</b> | <b>28</b> | <b>6</b> | <b>2</b> |

Notes: C, cosmopolitan species; IWP, Indo-west Pacific species (extending from eastern Africa to Hawaii); WP, West Pacific species (extending from eastern Australia to Hawaii); IM, Indo/Malayan species (extending from the eastern Indian Ocean, Indo-Malayan Archipelago, Australia and New Guinea, to Japan); AE, Australian endemic species (only occurring in Australia); AA, Australasian species (occurring in Australian and New Zealand); SAA, Australasian/Antarctic species (occurring in Australia, New Zealand and Antarctica).

<sup>a</sup>Introduced species.

**Table 3** Biogeographic affinities of barnacles of northern, southern, western, and eastern Australia

|              | Species numbers | C  | IWP | WP | IM | AE | AA | SAA |
|--------------|-----------------|----|-----|----|----|----|----|-----|
| Australia    | 279             | 54 | 92  | 21 | 76 | 28 | 6  | 22  |
| N. Australia | 221             | 44 | 87  | 16 | 65 | 8  | 1  | 0   |
| S. Australia | 129             | 37 | 26  | 10 | 25 | 23 | 6  | 2   |
| W. Australia | 189             | 41 | 73  | 4  | 56 | 12 | 3  | 0   |
| E. Australia | 205             | 47 | 62  | 20 | 47 | 21 | 6  | 2   |

Notes: C, cosmopolitan species; IWP, Indo-west Pacific species (extending from eastern Africa to Hawaii); WP, West Pacific species (extending from eastern Australia to Hawaii); IM, Indo/Malayan species (extending from the eastern Indian Ocean, Indo-Malayan Archipelago, Australia and New Guinea, to Japan); AE, Australian endemic species (only occurring in Australia); AA, Australasian species (occurring in Australia and New Zealand); SAA, Australasian/Antarctic species (occurring in Australia, New Zealand and Antarctica).

tropical IWP and six AE (Jones 1990b, 2003). A higher endemic element has been documented in other groups, e.g., decapods (77%) (Morgan and Jones 1991); stomatopods (Stephenson and McNeill 1955); molluscs (95%) (Wells 1980; Wilson and Allen 1987); echinoderms (90%) (Clark 1946; Rowe and Vail 1982), and fishes (85%) (Wilson and Allen 1987).

IWP species representation in the southern Australian temperate province decreases from west to east while most temperate species occurring along the southern coast of WA reach as far west as 34°27'S (Morgan and Jones 1991). Currently, there are no comparable field data regarding the shallow-water barnacle faunas occurring along remote temperate southern and southeastern coasts of Australia as, again, collecting is logistically extremely difficult.

*Austrobalanus nigrescens* (Lamarck 1818), *Catomerus polymerus* (Darwin 1854), and *Chthamalus antennatus* (Darwin 1854) are examples of barnacle species endemic to southern Australian waters. *Austrobalanus nigrescens* occurs from Kalbarri, WA (27°42'S 114°10'E), across southern Australia and northward to Double Island Point, Qld (25°56'S 153°11'E); *Chthamalus antennatus* from Eucla, WA (31°41'S 128°53'E), to Cooe Bay, Qld (23°08'S 150°45'E); and *Catomerus polymerus* from the Eyre Peninsula, SA (34.05°S 135.04°E), to Ballina Headland, NSW (28°52'S 153°36'E) (Jones 1990b, 2010).

### The overlap zones

The western and eastern coasts of Australia harbor diverse, distinct barnacle faunas. The western

barnacle fauna comprises 189 species, of which 41 have C, 73 have IWP, 4 have WP and 56 have IM affinities. Twelve species are AE and three have AA affinities (Tables 2 and 3); that of the eastern coast of Australia is composed of 205 species, of which 47 are C, 62 have IWP, 20 have WP, and 47 have IM affinities. Twenty-one species are AE, six have AA, and two SAA affinities (Tables 2 and 3).

In the western and eastern overlap zones, numbers of tropical species diminish with increasing latitude (Wilson and Allen 1987). In the western overlap zone, the percentage of IWP barnacle species at Shark Bay (25°56'S 113°32' E) reduces from 55% to 15% at Rottneest Island (32°00'S 115°30'E) (Jones 1990a, 1993; Jones and Hewitt 1995). Similarly, a reduction in the IWP element is documented in other groups, e.g., 74% of the decapod fauna at Shark Bay (Jones 1990c) and 39% of the marine crustacean fauna of Rottneest Island (Jones and Morgan 1993) are tropical IWP species.

A recognizable endemic component occurs in the western overlap zone, but the proportion of endemics varies between marine groups, e.g., 18% of the Shark Bay decapod fauna (Jones 1990c) and 48% of the marine crustacean fauna of Rottneest Island (Jones and Morgan 1993) are endemic, but less than 10% of prosobranch molluscs (Wells 1980) and 20% of shallow-water asteroids (Marsh 1976) are endemic. At Shark Bay (Jones 1990a; Jones and Hewitt 1995) and Rottneest Island (Jones 1993), 22% and 23% of the barnacle species, respectively, are endemic. Most of these endemic species have at least part of their range in the western overlap zone and often achieve their greatest numbers there (Wells 1980; Wilson and Allen 1987).

*Paralepas georgei* (Daniel 1970), *Tesseropora rapax* (Jones 1993), and *Tetrapachylasma ferrugomaculosa* (Jones 1993) are examples of barnacle species endemic to the western overlap zone. *Paralepas georgei* attaches to the gills of the Western Rock Lobster, *Panulirus cygnus*, which itself is endemic to the western coast of WA. *Tesseropora rapax* and *T. ferrugomaculosa* have limited distributions at Rottneest Island and along the mid-western coast.

The Leeuwin Current extends the southern latitudinal distributional limits of various marine taxa down the western coast. The Houtman Abrolhos Islands (28°19'–29°57'S) are generally considered to be the southern-most limit of the tropical marine biota (Wells 1980; Wilson and Allen 1987). Coral reefs are richly developed and marine faunas occurring there are essentially tropical (Montgomery 1931; Wilson and Marsh 1979; Wells 1980; Marsh and Marshall 1983; Veron and Marsh 1988).

At Rottneest Island, *Pocillopora damicornis* (Linnaeus 1758) forms one of the most southerly developments of reefs in the world and its associated symbiotic decapod crustacean fauna is similar to that found in many other tropical localities across the IWP (Black and Prince 1983). A substantial proportion of other marine faunas at Rottneest Island, including zoanthids, echinoids, gastropods, and fishes, are of tropical origin (Hodgkin et al. 1959; Black and Johnson 1983; Hutchins 1994; Wells 1980).

When shallow-water and deep-water barnacles are considered, of the 73 species of IWP barnacles known to occur on the northern and western coasts of WA, 10 reach Cape Leeuwin (34°27'S 116°22'E) and 6 extend onto the southern Australian coast (35°S) (Jones 1990b, 1990c, 1992a, 1993, 2003, 2004; Jones and Hewitt 1995, 1996, 1997; Jones et al. 1990; Jones and Berry 2000). Similar trends can be demonstrated in other groups; of 308 tropical prosobranch gastropod species, 9 reach Cape Leeuwin and 5 extend onto the southern coast (Wells 1980); of 318 hermatypic corals, 25 reach as far south as Rottneest Island and 9 occur on the southern coast (Veron and Marsh 1988); certain tropical echinoderm species extend into the Great Australian Bight (Maxwell and Cresswell 1981).

On the eastern Australian coast, south-eastern Queensland represents a transitional area between the tropical and southern temperate provinces and this is reflected in the composition of the barnacle fauna. Seventy-three barnacle species are recorded, with 22 C, 25 IWP, 9 IM, and 2 WP species (Jones 1992c, 2010). Three species have AA affinities and 12 are AE species. These figures demonstrate the influence of the tropical northern fauna and the 12 endemics reflecting the southern influence in this transitional zone.

The tropical chthamalids, *C. caudata* (Pilsbry 1916) and *Microeuraphia withersi* (Pilsbry 1916), extend from Point Vernon (25°14'S 152° 49'E) northward across the NT and to the Dampier Archipelago, WA (20°20'S 116°24'E), with *Chthamalus malayensis* (Pilsbry 1916) further extending to Shark Bay (25°56'S 113°32' E) (Jones 1990a, 2003, 2004, 2010). Conversely, their southern counterpart, the endemic *Chthamalus antennatus* (Darwin 1854) extends from Cooe Bay (23°08'S 150°45'E) southward then westward to Eucla, WA (31°41'S 128°53'E) (Jones 2010). A similar pattern can be demonstrated for the tropical tetracitid, *Tetracitella squamosa* (Bruguère 1789), from Point Vernon to Red Bluff, Kalbarri, WA (27°54'S 114°26'E), while the southern *Tetracitella purpurescens* (Wood 1815) and *Tesseropora rosea* (Krauss 1848) extend from

Double Island Point (25°56'S 153°11'E) and Bustard Heads (24°01'S 151°46' E) southward then westward to Red Bluff, Kalbarri, WA, and Cottesloe, WA (31°59'S 115° 45'E), respectively (Jones 1990b, 2004, 2010). The northern tropical iblomorph, *Ibla cumingi* (Darwin 1852), occurs from Point Vernon northward, across the NT to Burnside Island, Exmouth Gulf, WA (22°06'S 114°30.80'E), while its southern temperate counterpart, *Ibla quadrivalvis* (Cuvier 1817), extends from Currumbin (28°08'S 153°29'E) to Bunbury, WA (33°19'S 115°39'E) (Jones 1990b, 2010). The endemic malacolepadid, *Arcalepas brucei* (Jones and Morton 2009), is only known from Moreton Bay, Qld (27°28'00"S, 153°28'00"E) (Jones and Morton 2009).

### Introduced species

Records of introduced barnacles in Australian waters are not numerous. Pertinent literature documenting fouling and introduced Australian barnacle species was reviewed by Jones (1992b). Subsequent publications have documented introductions (Hass and Jones 1999; Jones 2003, 2004; Huisman et al. 2008; Wells et al. 2009; Yamaguchi et al. 2009), mainly focusing on Western Australian introductions. Information relating to introduced barnacle species is also contained in unpublished reports to industry and other stakeholders (D. S. Jones, unpublished data). Currently, 16 species are recognized as introductions into Australian waters: *Tetracitella pilsbryi*, *Striatobalanus krugeri*, *Amphibalanus improvisus*, *A. littoralis*, *A. poecilotheca*, *A. reticulatus*, *A. zhujiangensis*, *Fistulobalanus albicostatus*, *Megabalanus coccopoma*, *M. concinnus*, *M. occator*, *M. rosa*, *M. volcano*, *M. zebra*, *Notomegabalanus algicola*, and *N. krakatauensis* (Table 2). This number may well increase with a number of new ports being developed in Australia and therefore a concomitant increase in future shipping arrivals.

### Conclusions

This brief overview of the distributions and biogeographic affinities of Australian barnacles presents all data available to date. There are major gaps in information due to the vastness of the Australian coastline (~34,218 km), the logistics, and costs associated with accessing remote areas and the scarcity of cirripede workers. However, comprehensive field collecting in WA and southeastern Queensland, plus data from the literature and material in Australian museum collections, allows some general statements to be made.

Distributions corroborate the general patterns demonstrated for the shallow-water biota of the northern tropical and southern temperate Australian biogeographic provinces. The barnacle fauna of the northern Australian tropical province is continuous with other parts of the IWP and exhibits high species diversity, a high incidence of tropical species, and low endemism at the species level. Conversely, the southern Australian temperate barnacle fauna exhibits lower species diversity, a low incidence of tropical species, and high endemism of species. The IWP element constitutes the bulk of the tropical Australian shallow-water barnacle fauna, but representation of IWP species in the southern Australian temperate province is low and decreases from west to east.

Tropical and temperate provinces grade into each other in a broad overlap zone along both the western and eastern Australian coasts. This overlap zone is essentially a transitional region, with the gradual replacement of a tropical barnacle fauna in the north by a predominantly temperate barnacle fauna in the south. Most tropical IWP species reach as far south as North West Cape (21°47'S) on the western coast. The northern Australian tropical province thus extends to about 22°S inshore and to about 29°S at the Houtman Abrolhos (28°19'–29°57'S). On the eastern coast, the northern Australian tropical province extends to approximately Point Vernon, Qld (25°15'S, 152°49'E). In eastern Australia, the northern limit of temperate species is Cooe Bay, Qld (23°08'S 150°45'E), while in the west it is Red Bluff, Kalbarri, WA (27°54'S 114°26'E).

The barnacle faunas of western and eastern Australian coasts are diverse and distinct. On western coasts, IWP, IM, and C species dominate and AE, WP, and AA species have low representation, with SAA species not represented. On eastern Australian coasts, IWP, IM, C, AE, and WP species dominate, with AA and SAA species having low representation.

Both the western and eastern Australian coasts are bounded by major poleward-flowing warm currents, which have considerable influence on the marine flora and fauna. Tropical IWP barnacle species, and many other taxa, are distributed to the southwestern and southern coasts of Australia, much farther south than could be predicted by latitude, or by the warm, southward-flowing Leeuwin Current. A significant tropical IWP element is evident as far south as Rottnest Island (32°00'S) and a number of tropical species range farther south into the Great Australian Bight (39°00'S). While evidence is beginning to emerge that southward range extensions of biota in eastern Australia are attributable to an enhanced

EAC, no range extensions of barnacles have been reported to date.

Sixteen barnacle species are currently recognized as introductions into Australian waters, but this number may increase with the development of a number of new port facilities.

## Acknowledgments

I sincerely thank Professor John Zardus for his tremendous efforts in organizing the symposium *Barnacle Biology: Essential Aspects and Contemporary Approaches*. I also thank Professor John Buckeridge and an anonymous reviewer for pertinent comments that significantly improved an earlier draft of this article. I acknowledge the CSIRO, Australia, for their kind permission to reproduce Figure 1. I also thank all the conference organizers and the symposium participants for such a successful and enjoyable meeting.

## Funding

I wish to acknowledge the Society for Integrative and Comparative Biology for providing generous funding that allowed my attendance at the symposium. Funding for the work associated with data collection and completion of this paper has been generously provided through the following sources: the Western Australian Museum (1980 to present); Australian Museum Trust Postgraduate Scholarship (1984); Associate Professorship, Muséum national d'Histoire naturelle, Paris (1994, 1997, 2000); Department of Australian Heritage and CSIRO (1996–2005), National Ports Survey Project (1996–2005); Woodside Energy Ltd (1998–ongoing); Centre for Research on Introduced Marine Pests (CRIMP), CSIRO (1999); Gascoyne Development Commission (1999); Senckenberg Museum DAAD Research Fellowship (2000); Australian Heritage Commission (2003–2006); Western Australian Fisheries (2006); Australian Biological Resources Survey (2008–2012); Chevron Australia (2009–ongoing).

## References

- Anderson DT. 1992. Structure, function and phylogeny of coral-inhabiting barnacles (Cirripedia, Balanoidea). *Zool J Linn Soc* 106:277–339.
- Anderson DT. 1993. Addendum/Corrigendum. *Zool J Linn Soc* 105:377.
- Anderson DT, Anderson JT, Egan EA. 1988. Balanoid barnacles of the genus *Hexaminus* (Archaeobalanidae: Elminiinae) from mangroves of New South Wales, including a description of a new species. *Rec Aus Mus* 40:205–23.

- Annandale N. 1905. Malaysian barnacles in the Indian Museum with a list of the Indian Pedunculata. Mem Asiat Soc Bengal 1:73–84.
- Annandale N. 1906. Natural history notes from the R.I.M.S. "Investigator", Captain I.H. Heming, R.N., commanding. Series III, no. 12. Preliminary report on the Indian Stalked Barnacles. Ann Mag Nat Hist 17:389–400.
- Annandale N. 1910. An account of the Indian Cirripedia Pedunculata. Part I. Family Lepadidae (s. str.). Rec Ind Mus 2:51–137.
- Annandale N. 1916. Barnacles from deep-sea telegraph cables in the Malay Archipelago. J Straits Branch Roy Asiat Soc 74:281–302.
- Annandale N. 1924. Cirripedes associated with Indian corals of the families Astreaeidae and Fungidae. Mem Ind Mus 8:61–8.
- Aurivillius CWS. 1892. Neue Cirripeden aus dem Atlantischen, Indischen und Stillen Ocean. Oef K Vidensk Foren 3:123–35.
- Aurivillius CWS. 1894. Studien über Cirripeden. K Svenska Vetenskapaka Foren 26:5–107. pls 1–9.
- Aurivillius CWS. 1898. Cirripèdes nouveaux provenant des campagnes scientifiques de S.A.S. le Prince de Monaco. Bull Soc Zool France 23:189–99.
- Bayliss DE. 1988. A new intertidal barnacle of the genus *Elminius* (Cirripedia: Thoracica) from South Australia. Trans Roy Soc S Aust 112:75–9.
- Bayliss DE. 1994. Description of three new barnacles of the genus *Elminius* (Cirripedia: Thoracica) from South Australia, with a key to species of the Elminiinae. Trans Roy Soc S Aust 118:115–24.
- Blaber SJM, Young JW, Dunning MC. 1985. Community structure and zoogeographic affinities of the coastal fishes of the Dampier region of north-western Australia. Aus J Marine freshwater Res 36:247–66.
- Black R, Johnson MS. 1983. Marine biological studies on Rottneest Island. J Roy Soc West Aust 66:24–8.
- Black R, Prince J. 1983. Fauna associated with the coral *Pocillopora damicornis* at the southern limit of its distribution in Western Australia. J Biogeogr 10:135–52.
- Bonnemains J, Jones DS. 1990. Les crustacés de la collection C.-A. Lesueur d'histoire naturelle du Havre (dessins et manuscrits). Bulletin de la Société Géologique de Normandie et des amis du Muséum du Havre Tome 77. Fascicule 1, 1 ère Trimestre:27–66.
- Bowen M, Wilkin JL, Emery WJ. 2005. Variability and forcing of the East Australian Current. J Geophys Res 110:C03019.
- Broch H. 1916. Results of Dr E. Mjöberg's Swedish Scientific Expeditions to Australia 1910–1913No. VIII. Cirripeden. K Sven Vetenskapsakad Hand 52:3–16.
- Broch H. 1922. Studies on Pacific cirripeds. Papers from Dr Th. Mortensen's Pacific Expedition 1914–1916No. X. Vidensk Medd fra Dansk Naturh Foren: Kjøbenhavn 73:215–359.
- Broch H. 1931. Indo-Malayan Cirripedia. Papers from Dr Th. Mortensen's Pacific Expedition 1914–1916. Vidensk Medd fra Dansk Naturh Foren: Kjøbenhavn 91:1–146.
- Broch H. 1947. Cirripedes from Indochinese shallow-waters. Avhandl Norske Vidensk - Akad Oslo 1. Mat Naturv Kl 7:3–32.
- Bruguère M. 1789–1791. Encyclopédie méthodique: histoire naturelle des Vers 1. p. 1–173. (published 1792).
- Buckeridge JS. 1983. The barnacle subfamily Elminiinae - two new subgenera and a new Miocene species from Victoria. J R Soc N Z 12:353–7.
- Buckeridge JS. 1994. Cirripedia Thoracica: Verrucomorpha of New Caledonia, Indonesia, Wallis and Futuna Islands. In: Crosnier A, editor. Résultats des Campagnes MUSORSTOM 12. Mém Mus natn Hist nat, Vol. 4. p. 87–126.
- Buckeridge JS. 1999. A new deep sea barnacle, *Tetrachaelasma tasmanicum* sp. nov. (Cirripedia: Balanomorpha) from the South Tasman Rise. N Z J Marine freshwater Res 33:521–31.
- Buckeridge JS, Newman WA. 2006. A revision of the Iblidae and the stalked barnacles (Crustacea: Cirripedia: Thoracica), including new ordinal, familial and generic taxa, and two new species from New Zealand and Tasmanian waters. Zootaxa 1136:1–38.
- Burmeister H. 1834. Beiträge zur Naturgeschichte der Rankenfusser (Cirripedia). Berlin: G. Reimer. p. 60.
- Calman WT. 1918. On barnacles of the genus *Scalpellum* from deep-sea telegraph cables. Ann Mag Nat Hist 1:96–124.
- Calman WT. 1919. On barnacles of the genus *Megalasma* from deep sea telegraph cables. Ann Mag Nat Hist 4:361–74.
- Clark HL. 1946. The echinoderm fauna of Australia. Publicat Carnegie Inst 566:1–567.
- Conrad TA. 1837. Descriptions of new marine shells from upper California, collected by Thomas Nuttall, Esq. J Acad Nat Sci Philad Ser 1 7:227–68.
- Costa E da. 1778. Historia naturalis testaceorum Britanniae, or the British conchology. London. p. 254.
- Costa OG. 1838. Di alcuni Balanidi appartenenti al Regno di Napoli. Atti Accad Sci Napoli 5:17.
- Cresswell GR, Golding TJ. 1980. Observations of a southward flowing current in the south-eastern Indian Ocean. Deep-Sea Res 27A:449–66.
- Cuvier G. 1817. Mémoires pour servir à l'histoire naturelle et l'anatomie des Mollusques. Libraire, Paris: Chez Deterville. p. 17.
- Dall W. 1957. A revision of the Australian species of Penaeinae (Crustacea Decapoda: Penaeidae). Aust J Marine freshwater Res 8:136–230.
- Daniel A. 1953. Some new cirripedes from the Madras Coast. J Madras Univ ser B 23:219–22.
- Daniel A. 1970. A new pedunculate barnacle *Paralepas georgei* sp. nov. (Crustacea: Cirripedia-Thoracica) epizoic on Australian spiny lobsters and crabs. J Roy Soc WA 53:33–36.
- Darwin C. 1852. A monograph of the subclass Cirripedia, with figures of all species. The Lepadidae: or, pedunculated cirripedes. London: Ray Society. p. 400.
- Darwin C. 1854. A monograph of the subclass Cirripedia, with figures of all species. The Balanidae: the Verrucidae, etc. London: Ray Society. p. 684.
- Dunlop JN, Wooller RD. 1986. Range extensions and the breeding seasons of seabirds in south-western Australia. Rec West Aust Mus 12:389–94.
- Edgar GJ, Moverley JH, Barrett NS, Peters D, Reed C. 1997. The conservation related benefits of a systematic marine



- biological sampling program: the Tasmanian bioregionalisation as a case study. *Biol Conser* 79:227–40.
- Edivane K. 2003. Conservation, monitoring and recovery of giant kelp (*Macrocystis pyrifera*) beds in Tasmania. Report to Environment Australia, Department of Primary Industries, Water and the Environment. Hobart, Tasmania, Australia 177.
- Ellis J. 1758. An account of several rare species of barnacles. *Philos Trans* 50:845–55. (read December 21, 1758; published 1759).
- Ellis J, Solander D. 1786. The natural history of many curious and uncommon zoophytes collected from various parts of the globe. London: Benjamin White and Son. p. 197–198. pl. 15.
- Fabricius JC. 1798. *Entomologia systematica emendata et ancta... adjectis synonymis, locis, observationibus, descriptionibus. Supplementum. Ent Syste Supp Hafniae:1–572.* Copenhagen.
- Feng M, Meyers G, Pearce A, Wijffels S. 2003. Annual and interannual variations of the Leeuwin Current at 32°S. *J Geophys Res* 108:3355.
- Feng M, Wijffels S, Godfrey S, Meyers G. 2005. Do eddies play a role in the momentum balance of the Leeuwin Current? *J Phys Oceanogr* 35:964–75.
- Fischer P. 1884. Cirrhipèdes de l'Archipel de la Nouvelle-Calédonie. *Bull Soc Zool France* 9:355–60.
- Fischer P. 1886. Description d'un nouveau genre de Cirrhipèdes (*Stephanolepas*) parasite des tortues marines. *Act Soc Linn Bordeaux* 40:193–6.
- Foster BA. 1978. The Marine Fauna of New Zealand: Barnacles (Cirrropedia: Thoracica). New Zealand Oceanographic Institute Memoir 69. Wellington. p. 1–160.
- Foster BA. 1982. Two new intertidal barnacles from eastern Australia. *Proc Linn Soc NSW* 106:21–32.
- Foster BA. 1988. *Tetrapachylasma*: a new genus for a shallow water pachylasmatid barnacle from the Cook Islands (Cirrropedia, Balanomorph). *Crustaceana* 55:225–33.
- Foster BA, Anderson DT. 1986. New names for two well-known shore barnacles (Cirrropedia, Thoracica) from Australia and New Zealand. *J Roy Soc NZ* 16:57–69.
- Foster BA, Newman WA. 1987. Chthamalid barnacles of Easter Island; Peripheral pacific isolation of Notochthamalinae. New subfamily and *Hembeli* - group of Euraphinae (Cirrropedia: Chthamaloidea). *Bull Mar Sci* 41:322–36.
- Godfrey KR, Ridgeway KR. 1985. The large-scale environment of the poleward flowing Leeuwin Current, Western Australia: longshore steric height gradients, wind stresses, and geostrophic flow. *J Phys Oceanogr* 15:481–95.
- Graaf F de. 1952. Some notes on the genus *Lepas* Linné, 1767. *Beaufortia* 14:1–6.
- Gray JE. 1825. A synopsis of the genera of cirripedes arranged in natural families, with a description of some new species. *Ann Philos new series* 10:97–107.
- Griffin DJG, Yaldwyn JC. 1967. The constitution, distribution and relationships of the Australian decapod Crustacea. *Proc Linnean Soc NSW* 93:164–83.
- Griffiths SP. 2003. Rockpool ichthyofaunas of temperate Australia: species composition, residency and biogeographic patterns. *Estuarine Coastal Shelf Sci* 58:173–86.
- Gruvel A. 1902. Cirrhipèdes. Expéditions scientifiques du "Travailleur" et du "Talisman" pendant les années 1880, 1881, 1882 and 1883, Vol. 7. Paris: G. Masson et Cie. p. 1–178.
- Gruvel A. 1903. Révision des Cirrhipèdes Operculés. I. Partie Systematique. *Nouv Arch Mus Hist nat Paris*, sér 4: 95–170.
- Gruvel A. 1905. Monographie des Cirrhipèdes ou Thécostracés. Masson et Cie editeurs. Paris. p. 472. (Reprinted 1965 by A. Ascher & Co., Amsterdam, Netherlands.).
- Gruvel A. 1907. Cirrhipèdes operculés de l'Indian Muséum de Calcutta. *Mém Asiatic Soc Bengal* 2:1–10.
- Hass CG, Jones DS. 1999. Marine introductions to Western Australia, with a focus on crustaceans: 37–44. In: Kesby JA, Stanley JM, McLean RF, Olive LJ, editors. *Geodiversity: readings in Australian geography at the close of the 20th century. Special publication Series No. 6.* Canberra: ACT, School of Geography and Oceanography, University College, Australian Defence Force Academy. p. 630.
- Hinds RB. 1844. Voyage of "Sulphur", 1836–1842 Vol. 1. London: Mollusca.
- Hiro F. 1933. Notes on two interesting pediculate cirripeds, *Malacolepas conchicola* n. gen. et sp. and *Koleolepas avis* (Hiro), with remarks on their systematical position. *Mem College Sci Kyoto Imp Univ ser B* 8 art 7:233–47.
- Hiro F. 1936. Report on the Cirripedia collected in the Malayan waters by the ship "Zuiho-maru". *Japan J Zool* 6:621–36.
- Hiro F. 1937a. A new barnacle *Acasta echinata* n. sp. imbedded in the stalk of an alcyonarian from southern Japan. *Zool Mag, Tokyo* 49:70–1.
- Hiro F. 1937b. Cirripeds of the Palao Islands. *Palao Trop Biol Stn Stud* 1:37–72.
- Hiro F. 1938. Studies on animals inhabiting reef corals. II. Cirripeds on the genera *Creusia* and *Pyrgoma*. *Palao Trop Bio Stn Stud* 3:391–416.
- Hiro F. 1939. Studies on the cirripedian fauna of Japan. III. Supplementary notes on the cirripeds found in vicinity of Seto. *Mem Coll Sci Kyoto Imp Univ ser B*, 15:237–44.
- Hodgkin EP, Marsh L, Smith GG. 1959. The littoral environment of Rottneest Island. *J Roy Soc West Aust* 42:85–8.
- Hoek PPC. 1883. Report on the Cirripedia collected by *H. M. S. Challenger* during the years 1873–1876. Report on the Scientific Results of the Voyage *H. M. S. Challenger*, during the years 1873–76. *Zoology* 8:1–169.
- Hoek PPC. 1907. The Cirripedia of the Siboga expedition A. Cirripedia Pedunculata. *Siboga Expeditie Monographie* 31a:V–XXV, 1–127.
- Hoek PPC. 1913. The Cirripedia of the Siboga expedition B. Cirripedia Sessilia. *Siboga Expeditie Monographie* 31b:I–XXV, 129–275.
- Holthuis L.B. 1982. The nomenclature of some coral-inhabiting barnacles of the family Pyrgomatidae (Cirrropedia, Balanomorph). *Crustaceana* 43:316–20.
- Huisman JM, Jones DS, Wells FE, Burton T. 2008. Introduced marine biota in Western Australian waters. *Rec West Aust Mus* 25:1–44.
- Hutchins JB. 1994. A survey of the nearshore reef fish fauna of Western Australia's west and south coasts—the Leeuwin province. *Rec West Aust Mus Suppl.* 46):1–66.
- Hutchins JB, Pearce AF. 1994. Influence of the Leeuwin Current on recruitment of tropical reef fishes at Rottneest Island, Western Australia. *Bull Marine Sci* 54:245–55.

- Jones DS. 1987. Preliminary investigations on the barnacles of the Swan-Canning river estuary. In: John J, editor. Swan river estuary, ecology and management, Vol. 1. Perth: Curtin University Environmental Studies Group. p. 141–52.
- Jones DS. 1990a. A guide to the shallow-water barnacles (Cirripedia: Lepodomorpha, Balanomorpha) of the Shark Bay area, Western Australia. In: Berry PB, Bradshaw SD, Wilson BR, editors. Research in Shark Bay: Report of the France-Australe Bicentenary Expedition Committee. Perth: Western Australian. p. 209–29.
- Jones DS. 1990b. The shallow-water barnacles of southern Western Australia. In: Wells FE, Walker DI, Kirkman H, Lethbridge R, editors. Proceedings of the Third International Marine Biological Workshop: the Marine Flora and Fauna of Albany, Western Australia, Vol. 1. 1988. Perth: Western Australian Museum. p. 333–437.
- Jones DS. 1990c. Annotated checklist of marine decapod Crustacea from Shark Bay, Western Australia. In: Berry PB, Bradshaw SD, Wilson BR, editors. Research in Shark Bay: Report of the France-Australe Bicentenary Expedition Committee. Perth: Western Australian Museum. p. 169–208.
- Jones DS. 1991. A history of the discovery and description of Australian barnacles (Cirripedia: Thoracica), including a bibliography of reference works. Arch Natural Hist 18:149–78.
- Jones DS. 1992a. Part VI. Barnacles. In: Morgan GJ, editor. Survey of the Aquatic Fauna of the Kimberley Islands and Reefs, Western Australia. Report of the Western Australian Museum Kimberley Island and Reefs Expedition, August 1991. Perth: Western Australian Museum. p. 50–6.
- Jones DS. 1992b. A review of Australian fouling barnacles. Asian Marine Biol 9:89–100.
- Jones DS. 1992c. Scalpellid barnacles (Cirripedia: Thoracica) from the northeastern and central eastern Australian continental shelf and slope. Memoirs Queensland Mus 32:145–78.
- Jones DS. 1993. The barnacles of Rottneest Island with descriptions of two new species. In: Wells FE, Walker DI, Kirkman H, Lethbridge R, editors. Proceedings of the Fifth International Marine Biological Workshop: The Marine Flora and Fauna of Rottneest Island, Western Australia, 1991. Perth: Western Australian Museum. p. 113–33.
- Jones DS. 1994. Barnacles of the Cocos (Keeling) Islands. Atoll Res Bull 413. In: Woodroffe CD, editor. Ecology and geomorphology of the Cocos (Keeling) Islands. Washington, DC: National Museum of Natural History, Smithsonian Institution. p. 399–414.
- Jones DS. 1998. New genus and species of Calanticidae (Cirripedia: Thoracica: Scalpellomorpha) from Australian waters. Zoosystema 20:239–53.
- Jones DS. 2000. Crustacea Cirripedia Thoracica: Chionelasmatoidea and Pachylasmatoidea (Balanomorpha) of New Caledonia, Vanuatu and Wallis and Futuna Islands, with a review of all currently assigned taxa. In: Crosnier A, editor. Résultats des Campagnes MUSORSTOM 21. Mém Mus natn Hist nat, Vol. 184. p. 141–283.
- Jones DS. 2003. The biogeography of Western Australian shallow-water barnacles. In: Wells FE, Walker DI, Jones DS, editors. Proceedings of the Eleventh International Marine Biological Workshop: The Marine Flora and Fauna of Dampier, Western Australia, Vol. 2. Perth: Western Australian Museum. p. 479–96.
- Jones DS. 2004. Barnacles (Cirripedia: Thoracica) of the Dampier Archipelago, Western Australia. In: Jones DS, editor. Report on the results of the Western Australia Museum/Woodside Energy Ltd. Partnership to explore the Marine Biodiversity of the Dampier Archipelago, Western Australia 1998–2002. Rec West Aust Mus (Suppl. 66):121–57.
- Jones DS. 2010. The littoral and shallow-water barnacles (Crustacea: Cirripedia) of south-eastern Queensland. In: Davie PJF, Phillips JA, editors. Proceedings of the Thirteenth International Marine Biological Workshop, The Marine Fauna and Flora of Moreton Bay, Queensland. Mem Old Mus - Nature 54:47–82.
- Jones DS, Anderson JT, Anderson DT. 1990. A checklist of the Australian Cirripedia (Thoracica, Acrothoracica). Tech Rep Aust Mus 3:1–38.
- Jones DS, Berry PF. 2000. Crustacea of the Montebello Islands. In: Berry PF, Wells FE, editors. Survey of the Marine Fauna and Habitats of the Montebello Islands, Western Australia. Rec West Aust Mus (Suppl. 59):59–63.
- Jones DS, Hewitt MA. 1995. Barnacles (Cirripedia). In: Hutchins JB, Slack-Smith SM, Marsh LM, Jones DS, Bryce CW, Hewitt MA, Hill A, editors. Marine Biological Survey of Bernier and Dorre Islands. Report to the Ocean Rescue 2000 Program (Project number G009/93), October 1995. Perth: Western Australian Museum and Department of Conservation and Land Management. p. 45–56.
- Jones DS, Hewitt MA. 1996. Barnacles (Cirripedia). In: Hutchins JB, Slack-Smith SM, Bryce CW, Morrison SM, Hewitt MA, editors. Marine Biological Survey of the Muiron Islands and the eastern shore of Exmouth Gulf. Report to the Ocean Rescue 2000 Program (Project number G0012/94), February 1996. Perth: Western Australian Museum. p. 43–53.
- Jones DS, Hewitt MA. 1997. Barnacles (Cirripedia). In: Walker DI, editor. Marine Biological Survey of the Central Kimberley Coast, Western Australia (National Estates Grant Program Project), December 1996. Perth: University of Western Australia. p. 91–5.
- Jones DS, Hosie AM. 2009. A new species of *Calantica* from Western Australian waters (Thoracica: Scalpellomorpha: Calanticidae). Rec West Aust Mus 25:239–46.
- Jones DS, Morgan GJ. 1993. An annotated checklist of Crustacea from Rottneest Island, Western Australia. In: Wells FE, Walker DI, Kirkman H, Lethbridge R, editors. Proceedings of the Fifth International Marine Biological Workshop: The Marine Flora and Fauna of Rottneest Island, Western Australia, 1991. Perth: Western Australian Museum. p. 135–62.
- Jones DS, Morton B. 2009. A new genus and species of barnacle (Cirripedia, Pedunculata) commensal with *Arca naviicularis* Bruguière, 1798 (Mollusca, Bivalvia, Arcoidea) from Queensland, Australia, with an analysis of the relationship. Crustaceana 82:847–68.
- Kolbasov GA. 1993. Revision of the genus *Acasta* Leach (Cirripedia; Balanoidea). Zool J Linn Soc 109:395–427.
- Kolosváry G. 1947. A study of cirripedes associated with corals in the collection of the Hungarian National Museum, Budapest. Proc Zool Soc London 117:424–28.

- Krauss F. 1848. Die sudafrikanischen Mollusken. Ein Beitrag zur Kenntniss der Mollusken des Kap- und Natal-landes und zur geographischen Verbreitung derselben, mit Beschreibung und Abbildung der neuen Arten. Stuttgart.
- Krüger P. 1911. Beiträge zur Cirripedenfauna ostasiens. In: Doflein F, editor. Beiträge zur Naturgeschichte ostasiens. Abh. Bayer. Akad. Wiss, Suppl-Band 2. p. 1–72.
- Krüger P. 1914. Cirripeden. In: Michaelsen W, Hartmeyer E, editors. Die Fauna Südwest-Australiens, Vol. 4. Jena: Fisher. p. 427–41.
- Lamarck JBPA de M de. 1802. Mémoire sur la Tubicinelle. Ann Mus Natl d'Hist Nat 1:461–4.
- Lamarck JBPA de M de. 1818. Histoire naturelle des animaux sans vertèbres 5. Paris: Deterville. p. 375–410.
- Lanchester W.F. 1902. On the Crustacea collected during the "Skeat Expedition" to the Malay Peninsula. Proc Zool Soc London 2:363–81.
- Leach WE. 1817. Distribution systématique de la classe des Cirripèdes: par la même. J Phys Chim Hist Nat Paris 85:67–9.
- Leach WE. 1818. Narrative of an Expedition to explore the river Zaire, usually called the Congo... in 1816. To which is added the journal of Prof. [C.] Smith... and an appendix containing the natural history... Tuckey's Congo Expedition:1–498. London.
- Leach WE. 1825. A tabular view of the genera composing the Class Cirripedes, with descriptions of the species of *Otione*, *Cineras* and *Clypea*. Zool J 2 art. XXIII:208–15.
- Lessona C, Tapparone-Canefri C. 1874. Nota sulla *Macrocheira kaempferi* Sieb. e sopra una nuova specie del genere *Dichelaspis*. Atti Accad Sci Torino 9:185–94.
- Lewis C. 1978. A review of substratum selection in free-living and symbiotic cirripeds. In: Chia FS, Rice ME, editors. Settlement and metamorphoses of Marine Invertebrate larvae. NY: Elsevier. p. 207–18.
- Ling SD, Johnson CR, Ridgeway KR, Hobday AJ, Haddon M. 2008. Climate-driven range extension of a sea urchin: inferring future trends by analysis of recent population dynamics. Global Change Biol 15:719–31.
- Linnaeus C. 1758. Systema Naturae. Holmiae, Editio Decima, Reformata, 1. p. 824.
- Linnaeus C. 1766–1767. Systema Naturae. Holmiae, Editio Decima, Reformata. L. Salvii. p. 1327.
- Macdonald JD. 1869. On an apparently new genus of minute parasitic cirripede between *Lepas* and *Dichelespis*. Proc Zool Soc London 1869:44.
- Marsh LM. 1976. Western Australian Asteroidea since H.L. Clark. Thalassia Jugoslaven 12:213–25.
- Marsh LM, Marshall JI. 1983. Some aspects of the zoogeography of north-western Australian echinoderms (other than holothurians). Bull Marine Sci 33:671–87.
- Mata MM, Wijffels S, Tomczak M, Church JA. 2007. Eddy shedding and energy conversions in the East Australian Current. J Geophys Res 111:C09034.
- Maxwell JGH, Cresswell GR. 1981. Dispersal of tropical marine fauna to the Great Australian Bight by the Leeuwin Current. Aus J Marine freshwater Res 32: 493–500.
- Memmi MP. 1980. New subgenera and species of the genus *Lepas*. Zool Zh 59:949.
- Middleton JF, Bye JAT. 2007. A review of the shelf-slope circulation along Australia's southern shelves: Cape Leeuwin to Portland. Progr Oceanogr 77:1–44.
- Monroe R., Limpus CJ. 1979. Barnacles on turtles in Queensland waters with descriptions of three new species. Mem Qld Mus 19:197–223.
- Montgomery SK. 1931. Report on the Crustacea: Brachyura of the Percy Sladen Trust Expedition to the Abrolhos Islands under the leadership of Professor W.J. Dakin in 1913, along with other crabs of Western Australia. J Linn Soc Zool 37:405–65.
- Mörch OAL. 1852. Cephalophora Catalogus Conchyliorum: 65–68 (Cirripedia). Comes de Yoldi.
- Morgan GJ. 1990. A collection of Thalassinidea, Anomura and Brachyura (Crustacea: Decapoda) from the Kimberley region of north-western Australia. Zoologische Verhandlungen 265:1–90.
- Morgan GJ, Jones DS. 1991. Checklist of marine decapod Crustacea of southern Western Australia. In: Wells FE, Walker DI, Kirkman H, Lethbridge R, editors. Proceedings of the Third International Marine Biological Workshop: The Marine Flora and Fauna of Albany, Western Australia, 1988, Vol. 1. Perth: Western Australian Museum. p. 483–97.
- Morgan GJ, Wells FE. 1991. Zoogeographic provinces of the Humboldt, Benguela and Leeuwin Current systems. J Roy Soc West Aust 74:59–69.
- Newman WA. 1960. Five pedunculate cirripeds from the Western Pacific, including two new forms. Crustaceana 1:100–16.
- Newman WA. 1961. Notes on certain species of *Octolasmis* (Cirripedia, Thoracica) from deep sea Crustacea. Crustaceana 2:326–9.
- Newman WA. 1979. On the biogeography of balanomorph barnacles of the southern ocean including two new balanid taxa: a subfamily, two genera and three species. In: Proceedings of the International Symposium on Marine Biogeography and Evolution in the Southern Hemisphere, University of Auckland, July 14–29, 1978, New Zealand. Department of Scientific Industrial Research Information Series 137, 1:279–306.
- Newman WA. 1980. A review of extant *Scillaelepas* (Cirripedia: Scalpellidae) including recognition of new species from the north Atlantic, Western Indian Ocean and New Zealand. Tethys 9:379–98.
- Newman WA, 1987. Evolution of cirripedes and their major groups. In: Southward AJ, editor. Barnacle Biology, Crustacean Issues, Rotterdam: A.A. Balkema. 5:3–42.
- Newman WA, Ross A. 1971. Antarctic Cirripedia. Antarctic Res. Ser. 14:1–257. American Geophysical Union, Washington.
- Newman WA, Ross A. 1976. Revision of the balanomorph barnacles; including a catalog of the species. Mem San Diego Soc nat Hist 9:1–108.
- Nilsson-Cantell CA. 1921. Cirripeden-Studien. Zur kenntnis der Biologie, Anatomie und Systematik dieser Gruppe. Zool Bidrag Uppsala 7:75–395.
- Nilsson-Cantell CA. 1927. Some barnacles in the British Museum (Nat. Hist.). Proc Zool Soc London 1927:743–90.
- Nilsson-Cantell CA. 1930. Diagnoses of some new cirripedes from the Netherlands Indies collected by the Expedition of

- His Royal Highness the Prince Leopold of Belgium in 1929. Bull Mus Roy d'Hist Nat Belg 6:1–2.
- Nilsson-Cantell CA. 1932. Cirripeden aus Japan, gasammelt von Dr Smith, Dr Habener und Dr. Hilgendorf, in dem Berliner Museum aufbewahrt. Ark Zool 24A:1–29.
- Nilsson-Cantell CA. 1934. Cirripeds from the Malay Archipelago in the Zoological Museum of Amsterdam. Zool Meded 17:31–63.
- Nilsson-Cantell CA. 1938. Cirripedes from the Indian Ocean in the collection of the Indian Museum, Calcutta. Mem Indian Mus 13:1–81.
- O'Hara TD, Poore GCB. 2000. Patterns of distribution for southern Australian marine echinoderms and decapods. J Biogeogr 27:1321–35.
- Olfers I von. 1814. Magaz der Gesell Berlin 3d Quartel:177.
- Owen R. 1830. Catalogue of the contents of the Museum of the..... College..... Part IV. Fasciculus I. Comprehending the first division of the preparations of Natural History in spirit. Cat Mus Coll Surgeons Invert 1:1–44.
- Philippi RA. 1836. Cirripedia. Enumeratio Mollusc Siciliae. p. 267. Berolini.
- Phillips JA. 2001. Marine macroalgal biodiversity hotspots: why is there high species richness and endemism in southern Australian marine benthic flora? Biodiver Conser 10:1555–77.
- Pilsbry HA. 1890. Description of a new Japanese *Scalpellum*. Proc Acad Nat Sci Philad 42:441–3.
- Pilsbry HA. 1907. The barnacles (Cirripedia) contained in the collections of the U.S. National Museum. Bull U S Nat Mus 60:1–122.
- Pilsbry HA. 1910. *Stomatolepas*, a barnacle commensal in the throat of the loggerhead turtle. Am Nat 44:304–6.
- Pilsbry HA. 1911. Barnacles of Japan and Bering Sea. Bull U S Bur Fisheries 29:59–84.
- Pilsbry HA. 1912. Diagnoses of new barnacles from the Philippine Archipelago and the China Sea. Proc US Nat Mus 42:291–4.
- Pilsbry HA. 1916. The sessile barnacles (Cirripedia) contained in the collections of the U. S. National Museum, including a monograph of the American species. Bull U S Nat Mus 93:v–xi; 1–366.
- Pitombo FB. 2004. Phylogenetic analysis of the Balanidae (Cirripedia: Balanomorpha). Zoolog Scripta 33:261–76.
- Pittock B, editor. 2003. Climate Change: An Australian Guide to the Science and Potential Impacts. Canberra, ACT, Australia: Australian Greenhouse Office.
- Poli GS. 1795. Testacea utriusque Siciliae eorumque historia et anatome. Tom 2 Testac Utrius e Sicil 2:75–264.
- Poltarukha OP. 1997. Composition, phylogeny, and position in the subfamily Euraphiinae (Crustacea, Chthamalidae) in the system of Cirripedia. Russian J Zool 1:463–70.
- Poore GCB. 2001. Biogeography and diversity of Australia's marine biota. In: Zann LP, Kailola P, editors. The State of the Marine Environment Report for Australia Technical Annex: 1. The Marine Environment. Department of the Environment, Sport and Territories, Ocean Rescue 2000 Program. Townsville, Queensland, Australia: Great Barrier Reef Marine Park Authority. p. 75–84.
- Poore GCB. 2004. Marine decapod Crustacea of southern Australia. A guide to identification. Melbourne: CSIRO Publishing. p. 574.
- Poore GCB, McCallum AW, Taylor J. 2008. Decapod Crustacea of the continental margin of southwestern and central Western Australia: preliminary identifications of 524 species from the FRV Southern Surveyor voyage SS10-2005. Mus Victoria Sci Rep 11:1–106.
- Poore GCB, O'Hara TD. 2007. Marine biogeography and biodiversity of Australia. In: Connell SD, Gillanders BM, editors. Marine ecology. South Melbourne: Oxford University Press. p. 177–98.
- Pope EC. 1943. Animal and plant communities of the coastal rock platform at Long Reef, New South Wales. Proc Linnean Soc NSW 68:221–54.
- Pope EC. 1945. A simplified key to the sessile barnacles found on rocks, boats, wharf piles and other installations in Port Jackson and adjacent waters. Rec Aust Mus 21:351–72.
- Pope EC. 1958. The barnacle *Xenobalanus globicipitis* Steenstrup, in Australian seas. Proc Roy Zool Soc NSW 1956–57:159–61.
- Pope EC. 1965. A review of Australian and some Indomalayan Chthamalidae (Crustacea: Cirripedia). Proc Linnean Soc NSW 90:10–77.
- Racek AA. 1959. Prawn investigations in eastern Australia. Res Bull State Fisheries NSW 6:1–57.
- Ranzani C. 1817. Osservazioni su i Balanidi. Opuscoli Scientific 2:269–76. Bologna.
- Ranzani C. 1818. Osservazioni su i Balanidi. Opuscoli Scientific 2:63–93. Bologna.
- Reinhardt JT. 1850. Om Slaegten *Lithotryas* Evne til at bore sig ind Steenblokke. Vid Medd Naturh Foren Kjobenhavn 1:1–8.
- Ren X. 1989. Two new species and one new record of Cirripedia Thoracica from the South China Sea. Inst Oceanol Acad Sinica, Qingdao 20:466–73.
- Ren X, Liu JY. 1978. Studies on Chinese Cirripedia (Crustacea). 1. Genus *Balanus*. Stud Mar Sinica 13:119–96.
- Richardson AJ, Poloczanska ES. 2009. Australia's Oceans. In: Poloczanska ES, Hobday AJ, Richardson AJ, editors. A Marine Climate Change Impacts and Adaptation Report Card for Australia 2009. NCCARF Publication05/09.
- Ridgeway KR, Condie SA. 2004. The 5500-km-long boundary flow off western and southern Australia. J Geophys Res 109:C04017.
- Ridgeway KR, Dunn JR. 2003. Mesoscale structure of the mean East Australian Current System and its relationship with topography. Progr Oceanogr 56:189–222.
- Ridgeway KR, Hill KL. 2009. The East Australian current. In: Poloczanska ES, Hobday AJ, Richardson AJ, editors. A Marine Climate Change Impacts and Adaptation Report Card for Australia 2009. NCCARF Publication05/09, ISBN 978-1-921609-03-9.
- Ridgeway KR. 2007. Long-term trend and decadal variability of the southward penetration of the East Australian current. Geophys Res Lett 34:L13612.
- Ross A. 1970. Studies on the Tetraclitidae (Cirripedia: Thoracica): a proposed new genus for the Austral species *Tetraclita purpurascens breviscutum*. San Diego Soc Nat Hist Trans 1616:1–12.
- Ross A. 1999. Notes on the coral-inhabiting barnacles of the Great Barrier Reef, Australia (Cirripedia: Pyrgomatidae). Mem Qld Mus 43:833–6.

- Ross A, Frick MG. 2007. From Hendrickson (1958) to Monroe and Limpus (1979) and beyond: an evaluation of the Turtle Barnacle *Tubicinella cheloniae*. Mar. Turtle Newsletter 118:2–5.
- Ross A, Newman WA. 1973. Revision of the coral-inhabiting barnacles (Cirripedia: Balanidae). San Diego Soc Nat Hist Trans 17:137–74.
- Ross A, Newman WA. 1995. A coral-eating barnacle, revisited (Cirripedia: Pyrgomatidae). Contrib Zool Amsterdam 65:129–75.
- Ross A, Newman WA. 2000. A new coral-eating barnacle: the first record from the Great Barrier Reef, Australia. Mem Qld Mus 45:585–91.
- Ross A, Perreault RT. 1999. Revision of the Tetracitellinae and description of a new species of Newmanella Ross from the tropical western-Atlantic Ocean (Cirripedia: Tetracitoidea). Sessile Orgs 15:1–8.
- Ross A, Pitombo B. 2002. Notes on the coral-inhabiting Megatrematinae and the description of a new tribe, new genus and three new species (Cirripedia: Sessilia: Pyrgomatidae). Sessile Orgs 19:57–68.
- Rowe FWE, Vail LL. 1982. The distributions of Tasmanian echinoderms in relation to southern Australian biogeographic provinces. In: Lawrence JM, editor. Echinoderms: Proceedings of the International Conference. Tampa Bay. Rotterdam: Balkema. p. 219–225.
- Sander-Rang PK. 1829. Manuel de l'histoire naturelle des mollusques et de leurs coquilles, ayant pour base de classification celle de M. le Baron Cuvier. Manuel des Mollusques:1–390. (Paris).
- Say T. 1822. An account of some marine shells of the United States. J Acad Nat Sci Philadelphia 2:221–48, 302–25.
- Schumacher CF. 1817. *Essai d'un nouveau système des habitations des vers testacés*. Copenhagen. p. 287.
- Seguenza G. 1873–1876. Ricerche paleontologiche intorno ai Cirripedi terziarii della Provincia di Messina. Con appendice intorno ai Cirripedi viventi nel Mediterraneo e sui fossili terziarii dell'Italia Meridionale. Parte I, Balanidi e Verrucidi (1873), Parte II, Lepadidi (1876). Atti Accad Pontaniana 10:265–481.
- Sowerby GB. 1821–1834. The genera of recent and fossil shells, for the use of students in Conchology and Geology, with original Plates by James Sowerby (Nos. i–xvii), continued by J. de C. Sowerby, Nos. xviii–xlii). G.B. Sowerby, London. No pagination, 270 plates.
- Sowerby GB. 1839. A conchological manual. London.
- Speich S, Ganachaud A, Marsh R. 2002. Tasman leakage: a new route in the global conveyor belt. Geophys Res Lett 29:1416.
- Spengler L. 1790. Beskrivelse og Oplysning over den hidindtil lidet udarbejdede Slaegt af mangeskallede Konchylieer, som Linnaeus har kaldet *Lepas*, med tilføiede nye og ubeskrevne Arter. (Om. Conchylie-Slaegten *Lepas*). Skrifit Natur Selsk 1:158–212.
- Spengler L. 1793. Beskrivelse over tvende nye Arter af *Lepas*. Skrifit Natur Selsk 2:103–110.
- Stebbing TRR. 1894. A New Pedunculate Cirripede. An. and Mag Nat Hist Ser 6, 13:18. London.
- Steenstrup JJS. 1852. Om *Xenobalanus globicipitis*, en ny Cirriped-Slaegt af Coronula familien. Vidensk Med Dan Naturh Foren 1852:62–64.
- Stephenson W. 1972. An annotated checklist and key to the Indo-west Pacific swimming crabs (Crustacea: Decapoda: Portunidae). Roy Soc NZ Bull 10:1–64.
- Stephenson W, McNeill W. 1955. The Australian Stomatopoda (Crustacea) in the collections of the Australian Museum with a checklist and key to the known Australian species. Rec Aust Mus 23:239–65.
- Studer TL. 1889. Zoologie und Geologie Die Forschungsreise S.M.S. "Gazelle" in den Jahren 1874 bis 1876, III Theil. p. 322.
- Thresher RE, Proctor C, Ruiz G, Gurney R, McKinnon C, Walton W, Rodriguez L, Bax N. 2003. Invasion dynamics of the European shore crab, *Carcinus maenas*, in Australia. Marine Biol 142:867–76.
- Utinomi H. 1962. Studies on the cirripedian fauna of Japan. VIII Thoracic cirripeds from western Kyusyu. Publ Seto Mar Biol Lab 10:211–39.
- Utinomi H. 1967a. Occurrence of a new pedunculate cirripede on a small Spanish Lobster *Scyllarus bicuspidatus* (de Man) from Kamae Bay, northeastern Kyusyu. Publ Seto Mar Biol Lab 15:117–20.
- Utinomi H. 1967b. Comments on some new and already known cirripeds with emended taxa, with special reference to the parietal structure. Publ Seto Mar Biol Lab 15:199–237.
- Utinomi H. 1968. A revision of the deep-sea barnacles *Pachylasma* and *Hexelasma* from Japan, with a proposal of new classification of the Chthamalidae (Cirripedia, Thoracica). Publ Seto Mar Biol Lab 16:21–39.
- Veron JEN, Marsh LM. 1988. Hermatypic corals of Western Australia. Rec West Aust Mus Suppl. 29):1–136.
- Waters JM, Wernberg T, Connell SD, Thomsen MS, Zuccarello GC, Kraft GT, Sanderson JG, West JA, Gurgel CFD. 2010. Australia's marine biogeography revisited: back to the future? Austral Ecol 35:988–92.
- Wells FE. 1980. The distribution of shallow-water marine prosobranch gastropods along the coastline of Western Australia. Veliger 22:232–47.
- Wells FW, Mulligan M, Jones DS. 2009. Prevention of introduction of species brought into Geraldton Harbour, Western Australia, by the dredge *Leonardo da Vinci*. Records WA Museum 25:153–8.
- Weltner W. 1922. Cirripedia der deutschen Tiefsee-Expedition. Wiss. Erg. D. Tiefsee Exp. 23:61–112.
- Wilson BR, Allen GR. 1987. Major components and distribution of marine fauna. In: Dyne GR, Walton DW, editors. Fauna of Australia, Vol. 1A. Canberra: Australian Government Publishing Service. p. 43–68.
- Wilson BR, Marsh LM. 1979. Coral reef communities at the Houtman Abrolhos Islands, Western Australia, in a zone of biogeographic overlap. Proceedings of the International Symposium on Marine Biogeography and Evolution in the Southern Hemisphere, Vol. 137. New Zealand Department of Scientific Information and Research, Information Series. p. 259–78.
- Withers TH. 1935. Catalogue of fossil Cirripedia in the Department of Geology of the British Museum, Vol. 2. Cretaceous. British Museum London. p. 433.
- Withers W. 1953. Catalogue of fossil Cirripedia in the Department of Geology, Vol. 3. Tertiary. British Museum (Natural History) London. p. 1–396.
- Womersley HBS. 1960. The marine algae of Australia. Botanical Rev 25:545–614.

- Wood W. 1815. General conchology, or a description of shells arranged according to the Linnean system. England: John Booth.
- Yamaguchi T, Prabowo RE, Ohshiro Y, Shimono T, Jones D, Kawai H, Otani M, Oshino A, Inagawa S, Akaya T, Tamura I. 2009. The introduction to Japan of the Titan barnacle, *Megabalanus coccopoma* (Darwin 1854) (Cirripedia: Balanomorpha) and the role of shipping in its translocation. *Biofouling* 25:325–33.
- Young PS. 1998. Cirripedia (Crustacea) from the “Campagne Biaisores” in the Azores region, including a generic revision of the Verrucidae. *Zoosystema* 20:31–92.
- Zevina GB. 1968. New species of Lepadomorpha (Cirripedia, Thoracica) from the Bay of Tonkin. *Crustaceana* 15:35–40.
- Zevina GB. 1978. A new classification of the family Scalpellidae Pilsbry (Cirripedia, Thoracica). Part 1. Subfamilies Lithotryinae, Calanticinae, Pollicipinae, Scalpellinae, Brochiinae and Scalpellopsinae. *Zool. Zh.* 57:998–1006. (in Russian).
- Zevina GB. 1981. Deep-sea Cirripedia of the Australian and New Zealand waters. *Trudy Inst Oceanol* 115:76–93.
- Zevina GB. 1982. Cirripede Crustaceans of the suborder Lepadomorpha (Cirripedia, Thoracica) of the Pacific Ocean. *Opredeliteli Faune SSSR* 133:1–218. (in Russian).
- Zullo VA. 1984. New genera and species of balanoid barnacles from the Oligocene and Myocene of North Carolina. *J. Palaeontol* 58:1312–38.
